# Supplementary material for: Unusual titanium-induced McMurry coupling of 4-oxo-4H-chromene-2-carbaldehydes enroute to bis-chromones
Source: Royal Society of Chemistry journal article supplement (doi:10.1039/d0nj04730a), 2021-01-01
Supplement: d0nj04730a1.pdf [file d0nj04730a1.pdf]

## **SUPPLEMENTARY INFORMATION**

### **UNUSUAL TITANIUM INDUCED McMURRY COUPLING OF 4-OXO-4H-CHROMENE-2- CARBALDEHYDES ENROUTE TO BIS-CHROMONES**

Jayaprakash Rao Yerrabelly<sup>\*a</sup>, Pavan Kumar Bathini<sup>a,b</sup>, Hemasri Yerrabelly<sup>c</sup> and Kishore Vadapalli<sup>b</sup>

<sup>a</sup>*Department of Chemistry, University College of Science, Saifabad, Osmania University, Hyderabad 500004, India, email: yjpr\_19@yahoo.com*

<sup>b</sup>*Research and Development, Integrated Product Development, Innovation Plaza, Dr. Reddy's Laboratories Ltd., Bachupally, Quthubullapur, India*

<sup>c</sup>*Department of Chemistry, Nizam College, Osmania University, Hyderabad, 500001, India*

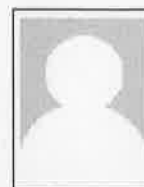

|                                                                                                  |            |
|--------------------------------------------------------------------------------------------------|------------|
| <b>General Information</b>                                                                       | <b>2</b>   |
| <b>General reaction procedure for McMurry coupling of 4-oxo-4H-chromene-2-carbaldehydes 7a-i</b> | <b>3</b>   |
| <b>Characterization data of products 9 a-i, 11-12</b>                                            | <b>3-6</b> |
| <b>Single Crystal Data</b>                                                                       | <b>7</b>   |
| <b><sup>1</sup>H-NMR, <sup>13</sup>C-NMR and HRMS spectrums</b>                                  |            |

## Experimental section

### *General Information*

Electrospray ionization and tandem mass spectrometry experiments were performed using a triple quadrupole mass spectrometer (PE Sciex model API 3000). The positive and negative electrospray data were obtained by switching the capillary voltage between +5000 and -4500 V, respectively. For HRMS, UPLC-TOF-MS system consisted of an ACQUITY™ Ultra Performance Liquid Chromatography system and Micromass LCT Premier XE Mass Spectrometer (High sensitivity orthogonal time-of-flight instrument; Waters, Milford, USA) equipped with an ESI lock spray source for accurate mass values. Leucine-enkephalin was used as reference compound and introduced via the lock spray channel.

The NMR experiments were performed on Varian spectrometers operating at 400 and 500 MHz in DMSO (D<sub>6</sub>) and CDCl<sub>3</sub> at 30 °C. The <sup>1</sup>H chemical shift values were reported on the δ scale in ppm, relative to TMS (δ = 0.00) and the <sup>13</sup>C chemical shift values were reported relative to DMSO (δ = 40 ppm), CDCl<sub>3</sub> (δ = 77 ppm) as internal standards.

- For the compounds **9b**, **9f** and **9g** <sup>13</sup>C NMR could not be recorded due to low solubility in selective NMR solvents.

X-ray reflections for compound **9h** were collected at 290 K on an Oxford Xcalibur Mova E diffractometer equipped with an EOS CCD detector and a microfocus sealed tube using Mo K $\alpha$  radiation ( $\lambda$ = 0.7107 Å). Data collection and reduction was performed using CrysAlisPro (version 1.171.36.32) and OLEX2 (version 1:2) was used to solve and refine the crystal structures. All non-hydrogen atoms were refined anisotropically. All C–H atoms were fixed geometrically. The final CIF files were validated in PLATON and doesn't resulted in any missed symmetry. General procedure for McMurry coupling of 4-oxo-4*H*-chromen-2-carbaldehydes **7a-i** Zn powder (4 mmol) was added to 15 volumes of dry THF under stirring at 0-5°C followed by TiCl<sub>4</sub> (2 mmol). Reaction temperature was raised 60-65°C, maintained for about 3 h and then cooled to 0-5°C. Pyridine (2.5 mmol) and corresponding chromone-2-carbaldehyde (**7a-i**) (1.0 mmol) in 15 volumes of dry THF were then added to the mixture. Reaction temperature was raised to 60-65°C and maintained for 3-4 h. Reaction mass was cooled to 10-15°C and quenched with 10% K<sub>2</sub>CO<sub>3</sub> solution. After filtering the inorganic salts product was extracted into

dichloromethane, which was concentrated under reduced pressure to get the product in crude form. Pure products (**9a-h**, **9j**) were obtained by passing the crude products through silica column (ethylacetate : petether, 40 : 60).

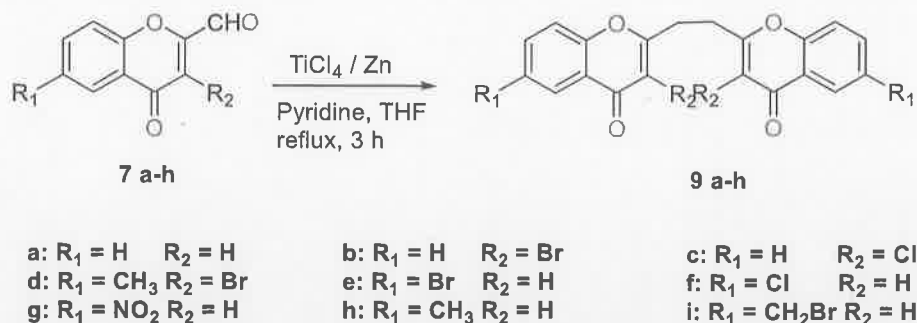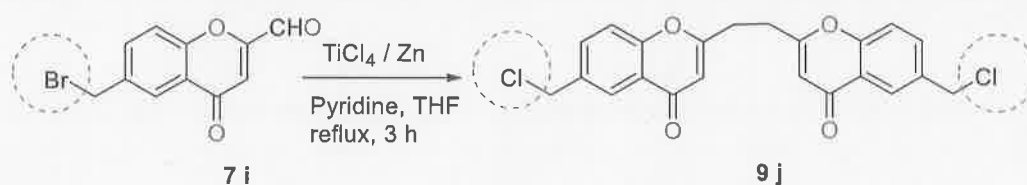

### Characterization data for products 9 a-i, 11-12

#### 2,2'-(Ethane-1,2-diyl)bis(4*H*-chromen-4-one) (**9a**)

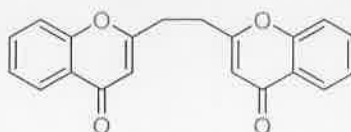

Pale yellow crystallin solid (165 mg, 52%), mp: 190-193 °C: <sup>1</sup>H NMR (400 MHz, DMSO-d<sub>6</sub>, ppm): δ = 8.01 (dd, 1H, *J* = 8.4, 2.0 Hz, H-5), 7.79 (dt, 1H, *J* = 8.8, 2.0 Hz, H-7), 7.56 (d, 1H, *J* = 8.4 Hz, H-8), 7.48 (t, 1H, *J* = 7.6 Hz, H-6), 6.35 (s, 1H, H-3) and 3.15 (s, 2H, H-2a). <sup>13</sup>C NMR (100 MHz, DMSO-d<sub>6</sub>, ppm): δ = 30.3 (CH<sub>3</sub>), 109.8 (C-3), 118.0 (C-Ar), 123.0 (C-Ar), 124.8 (C-Ar), 125.3 (C-Ar), 134.1 (C-Ar), 155.8 (C-8a), 167.6 (C-2), 176.7 (C-4, CO). IR (KBr): ν = 1650, 1380 cm<sup>-1</sup>. HRMS (ESI-TOF/MS): *m/z* calcd. for C<sub>20</sub>H<sub>15</sub>O<sub>4</sub> [M+H]<sup>+</sup>: 319.0970; found: 319.0956.

#### 2,2'-(Ethane-1,2-diyl)bis(3-bromo-4*H*-chromen-4-one) (**9b**)

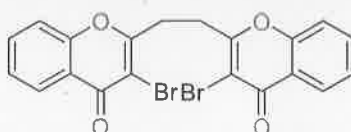

Pale yellow crystalline powder (240 mg, 51%), mp: 266-288 °C. <sup>1</sup>H NMR (400 MHz, DMSO-d<sub>6</sub>, ppm): δ = 8.00 (dd, 1H, *J* = 7.6, 1.2 Hz, H-5), 7.79-7.83 (m, 1H, H-7), 7.56 (d, 1H, *J* = 8.0 Hz, H-8), 7.52 (t, 1H, *J* = 6.8 Hz, H-6) and 3.50 (s, 2H, H-2a). FT-IR (KBr): ν = 1646 cm<sup>-1</sup> (C=O), HRMS (ESI-TOF/MS): *m/z* calcd. for C<sub>20</sub>H<sub>13</sub>O<sub>4</sub>Br<sub>2</sub> [M+H]<sup>+</sup>: 474.9181; found: 474.9202.

**2,2'-(Ethane-1,2-diyl)bis(3-chloro-4*H*-chromen-4-one) (9c)**

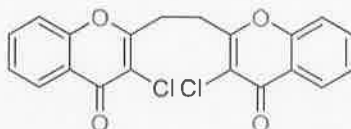

Off white crystalline powder (232 mg, 60%). mp: 254-256 °C: <sup>1</sup>H NMR (400MHz, DMSO-d<sub>6</sub>, ppm): δ = 8.07 (d, 1H, *J* = 8.0 Hz, H-5), 7.84 (t, 1H, *J* = 7.6 Hz, H-7), 7.58 (d, 1H, *J* = 8.8 Hz, H-8), 7.54 (t, 1H, *J* = 7.6 Hz, H-6) and 3.47 (s, 2H, H-2a). <sup>13</sup>C NMR (100 MHz, CDCl<sub>3</sub>, ppm): δ = 29.1 (C-2a), 117.6 (C-3), 118.8 (C-Ar), 122.3 (C-Ar), 125.7 (C-Ar), 126.3 (C-Ar), 134.1 (C-Ar), 155.2 (C-8a), 162.6 (C-2), 172.0 (C-4, CO). FT-IR (KBr): ν = 1648 cm<sup>-1</sup> (C=O). HRMS (ESI-TOF/MS): *m/z* calcd. for C<sub>20</sub>H<sub>13</sub>O<sub>4</sub>Cl<sub>2</sub> [M+H]<sup>+</sup>: 387.0191; found: 387.0178.

**2,2'-(Ethane-1,2-diyl)bis(3-bromo-6-methyl-4*H*-chromen-4-one) (9d)**

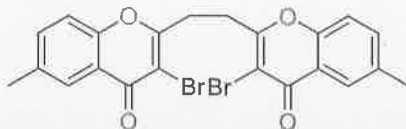

Off white crystalline powder (300 mg, 60%), mp: 250-253 °C: <sup>1</sup>H NMR (400 MHz, CDCl<sub>3</sub>, ppm): δ = 7.99 (s, 1H, H-5), 7.47 (dd, 1H, *J* = 8.8, 2.0 Hz, H-7), 7.25 (d, 1H, *J* = 8.8 Hz, H-8), 3.49 (s, 2H, H-2a) and 2.45 (s, 3H, 6-CH<sub>3</sub>). <sup>13</sup>C NMR (100 MHz, CDCl<sub>3</sub>, ppm): δ = 20.8 (6-CH<sub>3</sub>), 31.5 (C-2a), 110.0 (C-3), 117.2 (C-Ar), 121.4 (C-Ar), 125.6 (C-Ar), 135.3 (C-Ar), 135.8 (C-Ar), 153.5 (C-8a), 163.5 (C-2), 172.2 (C-4, CO). FT-IR (KBr): ν = 1643 cm<sup>-1</sup> (C=O). HRMS (ESI-TOF/MS): *m/z* calcd. for C<sub>22</sub>H<sub>17</sub>O<sub>4</sub>Br<sub>2</sub> [M+H]<sup>+</sup>: 502.9494, found: 502.9487.

**2,2'-(Ethane-1,2-diyl)bis(6-bromo-4*H*-chromen-4-one) (9e)**

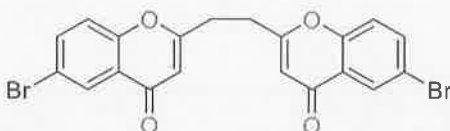

Yellow crystalline powder (240 mg, 50%), mp: 245-247 °C; <sup>1</sup>H NMR (400 MHz, CDCl<sub>3</sub>, ppm): δ = 8.30 (d, 1H, *J* = 2.4 Hz, H-5), 7.75 (dd, 1H, *J* = 2.4 Hz, 8.8 Hz, H-7), 7.28 (d, 1H, *J* = 10.4 Hz, H-8), 6.23 (s, 1H, H-3) and 3.09 (s, 2H, H-2a). <sup>13</sup>C NMR (100 MHz, CDCl<sub>3</sub>, ppm): δ = 31.5 (C-2a), 110.5 (C-3), 118.8 (C-Ar), 119.6 (C-Ar), 124.9 (C-Ar), 128.4 (C-Ar), 136.8 (C-Ar), 155.0 (C-

8a), 166.5 (C-2), 176.5 (C-4, CO). FT-IR (KBr):  $\nu = 1649 \text{ cm}^{-1}$  (C=O). HRMS (ESI-TOF/MS):  $m/z$  calcd. for  $\text{C}_{20}\text{H}_{13}\text{O}_4\text{Br}_2$   $[\text{M}+\text{H}]^+$ : 474.9181; found: 474.9182.

**2,2'-(Ethane-1,2-diyl)bis(6-chloro-4H-chromen-4-one) (9f)**

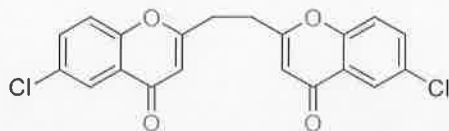

Brown crystalline powder (235 mg, 60%), mp: 233-236 °C;  $^1\text{H}$  NMR (400 MHz,  $\text{CDCl}_3$ +DMSO- $d_6$ , ppm):  $\delta = 7.93$  (d, 1H,  $J = 3.2$  Hz, H-5), 7.82 (dd, 1H,  $J = 8.8, 2.8$  Hz, H-7), 7.60 (d, 1H,  $J = 8.8$  Hz, H-8), 6.40 (s, 1H, H-3) and 3.15 (s, 1H, H-2a). FT-IR (KBr):  $\nu = 1651 \text{ cm}^{-1}$  (C=O). HRMS (ESI-TOF/MS):  $m/z$  calcd. for  $\text{C}_{20}\text{H}_{13}\text{O}_4\text{Cl}_2$   $[\text{M}+\text{H}]^+$ : 387.0191; found: 387.0198.

**2,2'-(Ethane-1,2-diyl)bis(6-nitro-4H-chromen-4-one) (9g)**

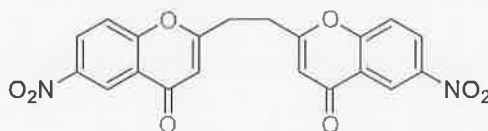

Yellow crystalline powder (210 mg, 50%), mp: 199-201 °C;  $^1\text{H}$  NMR (400 MHz,  $\text{CDCl}_3$ , ppm):  $\delta = 9.06$  (dd, 1H,  $J = 6.8, 2.4$  Hz, Ar-H), 8.45-8.52 (m, 2H, Ar-H), 8.33 (t, 1H,  $J = 6.4$  Hz, Ar-H), 7.51-7.58 (m, 2H, Ar-H), 6.32 (dd, 1H,  $J = 6.4, 1.6$  Hz, H-3) and 3.25 (d, 2H,  $J = 15.4$  Hz, H-2a). FT-IR (KBr):  $\nu = 1656 \text{ cm}^{-1}$  (C=O). HRMS (ESI-TOF/MS):  $m/z$  calcd. for  $\text{C}_{20}\text{H}_{13}\text{N}_2\text{O}_8$   $[\text{M}+\text{H}]^+$ : 409.0672; found: 409.0661.

**2,2'-(Ethane-1,2-diyl)bis(6-methyl-4H-chromen-4-one) (9h).**

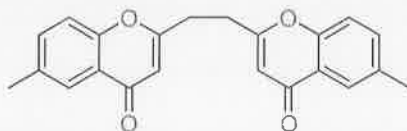

Off white crystalline powder (210 mg, 60%). mp: 195-197 °C;  $^1\text{H}$  NMR (400 MHz, DMSO- $d_6$ , ppm):  $\delta = 7.78$  (d, 1H,  $J = 1.2$  Hz, H-5), 7.59 (dd, 1H,  $J = 8.0, 1.6$  Hz, H-7), 7.43 (d, 1H,  $J = 8.4$  Hz, H-8), 6.30 (s, 1H, H-3), 3.12 (s, 2H, H-2a) and 2.40 (s, 3H, 6- $\text{CH}_3$ ).  $^{13}\text{C}$  NMR (100 MHz,  $\text{CDCl}_3$  + DMSO- $d_6$ , ppm):  $\delta = 20.4$  (6- $\text{CH}_3$ ), 30.4 (C-2a), 109.6 (C-3), 117.8 (C-Ar), 122.7 (C-Ar), 124.1 (C-Ar), 134.8 (C-Ar), 135.1 (C-Ar), 154.1 (C-8a), 167.4 (C-2), 176.7 (C-4, CO). FT-IR (KBr):  $\nu = 1643 \text{ cm}^{-1}$  (C=O). HRMS (ESI-TOF/MS):  $m/z$  calcd. for  $\text{C}_{22}\text{H}_{19}\text{O}_4$   $[\text{M}+\text{H}]^+$ : 347.1283; found: 347.1278.

**2,2'-(Ethane-1,2-diyl)bis(6-(chloromethyl)-4H-chromen-4-one) (9i)**

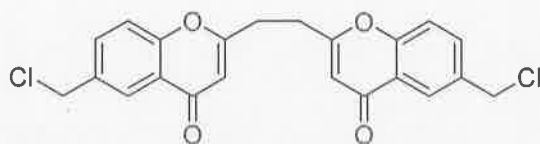

Pale yellow crystalline solid (215 mg, 52%). mp: 119-122 °C.  $^1\text{H}$  NMR (400 MHz,  $\text{CDCl}_3$ , ppm):  $\delta$  = 8.16 (s, 1H, H-5), 7.70 (d, 1H,  $J=8.8$  Hz, H-7), 7.40 (d, 1H,  $J=8.8$  Hz, H-8), 6.23 (s, 1H, H-3), 4.66 (s, 2H, 6- $\text{CH}_2\text{Cl}$ ) and 3.10 (s, 2H, H-2a).  $^{13}\text{C}$  NMR (100 MHz,  $\text{CDCl}_3$ , ppm):  $\delta$  = 31.4 (C-2a), 45.0 (C-6a), 110.6 (C-3), 118.5 (C-Ar), 123.5 (C-Ar), 125.6 (C-Ar), 134.1 (C-Ar), 134.9 (C-Ar), 155.1 (C-2), 166.4 (C-8a), 177.8 (C-4, CO). FT-IR (KBr):  $\nu$  = 1644  $\text{cm}^{-1}$  (C=O). HRMS (ESI-TOF/MS):  $m/z$  calcd. for  $\text{C}_{22}\text{H}_{17}\text{Cl}_2\text{O}_4$   $[\text{M}+\text{H}]^+$ : 415.0504; found: 415.0512.

**2,2'-(1,2-Dihydroxyethane-1,2-diyl)bis(4H-chromen-4-one) (11).**

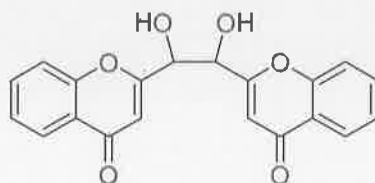

White crystalline solid (217 mg, 62%). mp: 219-221 °C.  $^1\text{H}$  NMR (400 MHz,  $\text{DMSO-d}_6$ , ppm):  $\delta$  = 8.04 (dd, 1H,  $J=8.4, 1.2$  Hz, H-5), 7.80 (dt, 1H,  $J=8.8, 1.6$  Hz, H-7), 7.57 (d, 1H,  $J=8.4$  Hz, H-8), 7.50 (t, 1H,  $J=8.0$  Hz, H-6), 6.46 (s, 1H, H-3), 6.22 (d, 1H,  $J=6.0$  Hz, 2a-OH) and 4.97 (d, 1H,  $J=6.4$  Hz, H-2a).  $^{13}\text{C}$  NMR (100 MHz,  $\text{DMSO-d}_6$ , ppm):  $\delta$  = 71.2 (C-2a), 109.0 (C-3), 118.2 (C-8), 123.9 (C-6), 124.8 (C-4a), 125.3 (C-5), 134.1 (C-7), 155.6 (C-8a), 168.6 (C-2a), 176.7 (C-4, CO). FT-IR (KBr):  $\nu$  = 3345  $\text{cm}^{-1}$  (OH), 1650  $\text{cm}^{-1}$  (C=O). ESI-MS:  $m/z$  351.2  $[\text{M}+\text{H}]^+$ .

**3-Bromo-6-methyl-2-(2-(4-oxo-4H-chromen-2-yl)ethyl)-4H-chromen-4-one (12).**

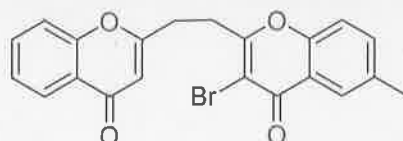

Pale yellow crystalline solid (290 mg, 70%). mp: 141-143 °C.  $^1\text{H}$  NMR (400 MHz,  $\text{CDCl}_3$ , ppm):  $\delta$  = 8.18 (dd, 1H,  $J=7.6, 1.6$  Hz, H-5), 8.01 (s, 1H, H-7), 7.66 (dt, 1H,  $J=8.0, 1.2$  Hz, Ar-H), 7.46 (dd, 1H,  $J=8.0, 1.2$  Hz, Ar-H), 7.35-7.40 (m, 3H, Ar-H), 7.23 (s, 1H, Ar-H), 6.24 (s, 1H, H-3), 3.44 (t, 2H,  $J=7.6$  Hz, H-2a), 3.16 (t, 2H,  $J=8.0$  Hz, H-2a') and 2.46 (s, 3H, 6- $\text{CH}_3$ ).  $^{13}\text{C}$  NMR (100 MHz,  $\text{CDCl}_3$ , ppm):  $\delta$  = 20.9 (6'- $\text{CH}_3$ ), 32.1-32.0 (C-2a, C-2'a), 110.0 (C-3'), 110.5 (C-3), 117.2 (C-Ar), 117.7 (C-Ar), 121.5 (C-Ar), 123.6 (C-Ar), 125.2 (C-Ar), 125.7 (C-Ar), 133.7 (C-Ar), 135.4 (C-Ar), 135.9 (C-Ar), 153.5 (C-Ar), 156.3 (C-Ar), 163.6 (C-8a), 166.3 (C-2a), 178.0 (C-4, CO), 172.2 (C-4', CO). FT-IR (KBr):  $\nu$  = 1644  $\text{cm}^{-1}$  (C=O). HRMS (ESI-TOF/MS):  $m/z$  calcd. for  $\text{C}_{21}\text{H}_{16}\text{O}_4\text{Br}$   $[\text{M}+\text{H}]^+$ : 411.0232; found: 411.0238.

Single Crystal Data (Crystallographic parameters of compound **9h**).

|                                                         |               |
|---------------------------------------------------------|---------------|
| Temperature / K                                         | 290K          |
| Compound                                                | 9h            |
| Formula weight                                          | 346.36        |
| Crystal system                                          | Orthorhombic  |
| Space group                                             | <i>C2cb</i>   |
| <i>a</i> / Å                                            | 7.4743(5)     |
| <i>b</i> / Å                                            | 15.2098(8)    |
| <i>c</i> / Å                                            | 14.2562(8)    |
| $\alpha$ / °                                            | 90            |
| $\beta$ / °                                             | 90            |
| $\gamma$ / °                                            | 90            |
| Volume / Å <sup>3</sup>                                 | 1620.68(2)    |
| <i>Z</i>                                                | 4             |
| Density / (g cm <sup>-3</sup> )                         | 1.42          |
| $\mu$ / mm <sup>-1</sup>                                | 0.097         |
| <i>F</i> <sub>000</sub>                                 | 728           |
| <i>h</i> <sub>min</sub> , <i>h</i> <sub>max</sub>       | -8, 8         |
| <i>k</i> <sub>min</sub> , <i>k</i> <sub>max</sub>       | -18, 18       |
| <i>l</i> <sub>min</sub> , <i>l</i> <sub>max</sub>       | -16, 16       |
| No. of measured reflections                             | 11806         |
| No. of unique reflections                               | 1427          |
| No. of reflections used                                 | 1133          |
| <i>R</i> <sub>all</sub> , <i>R</i> <sub>obs</sub>       | 0.095, 0.075  |
| <i>wR</i> <sub>2,all</sub> , <i>wR</i> <sub>2,obs</sub> | 0.202, 0.186  |
| $\Delta\rho_{\text{min,max}}$ / (e Å <sup>-3</sup> )    | -0.518, 0.408 |
| <i>Goof</i>                                             | 1.082         |
| <i>CCDC No.</i>                                         | 1818348       |

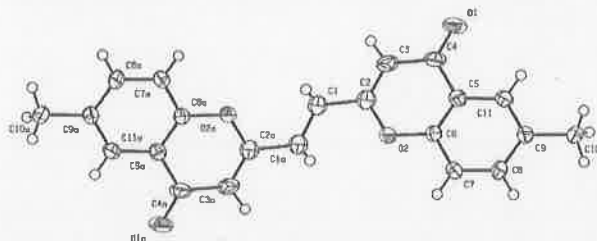

Ortep diagram of 2,2'-(ethane-1,2-diyl)bis(6-methyl-4*H*-chromen-4-one) (**9h**)

<sup>1</sup>H NMR (DMSO-d<sub>6</sub>) of 2,2'-(Ethane-1,2-diyl)bis(4H-chromen-4-one) (**9a**)

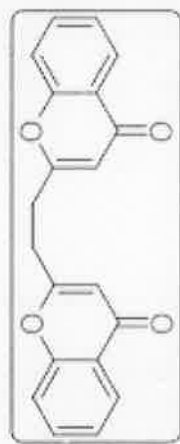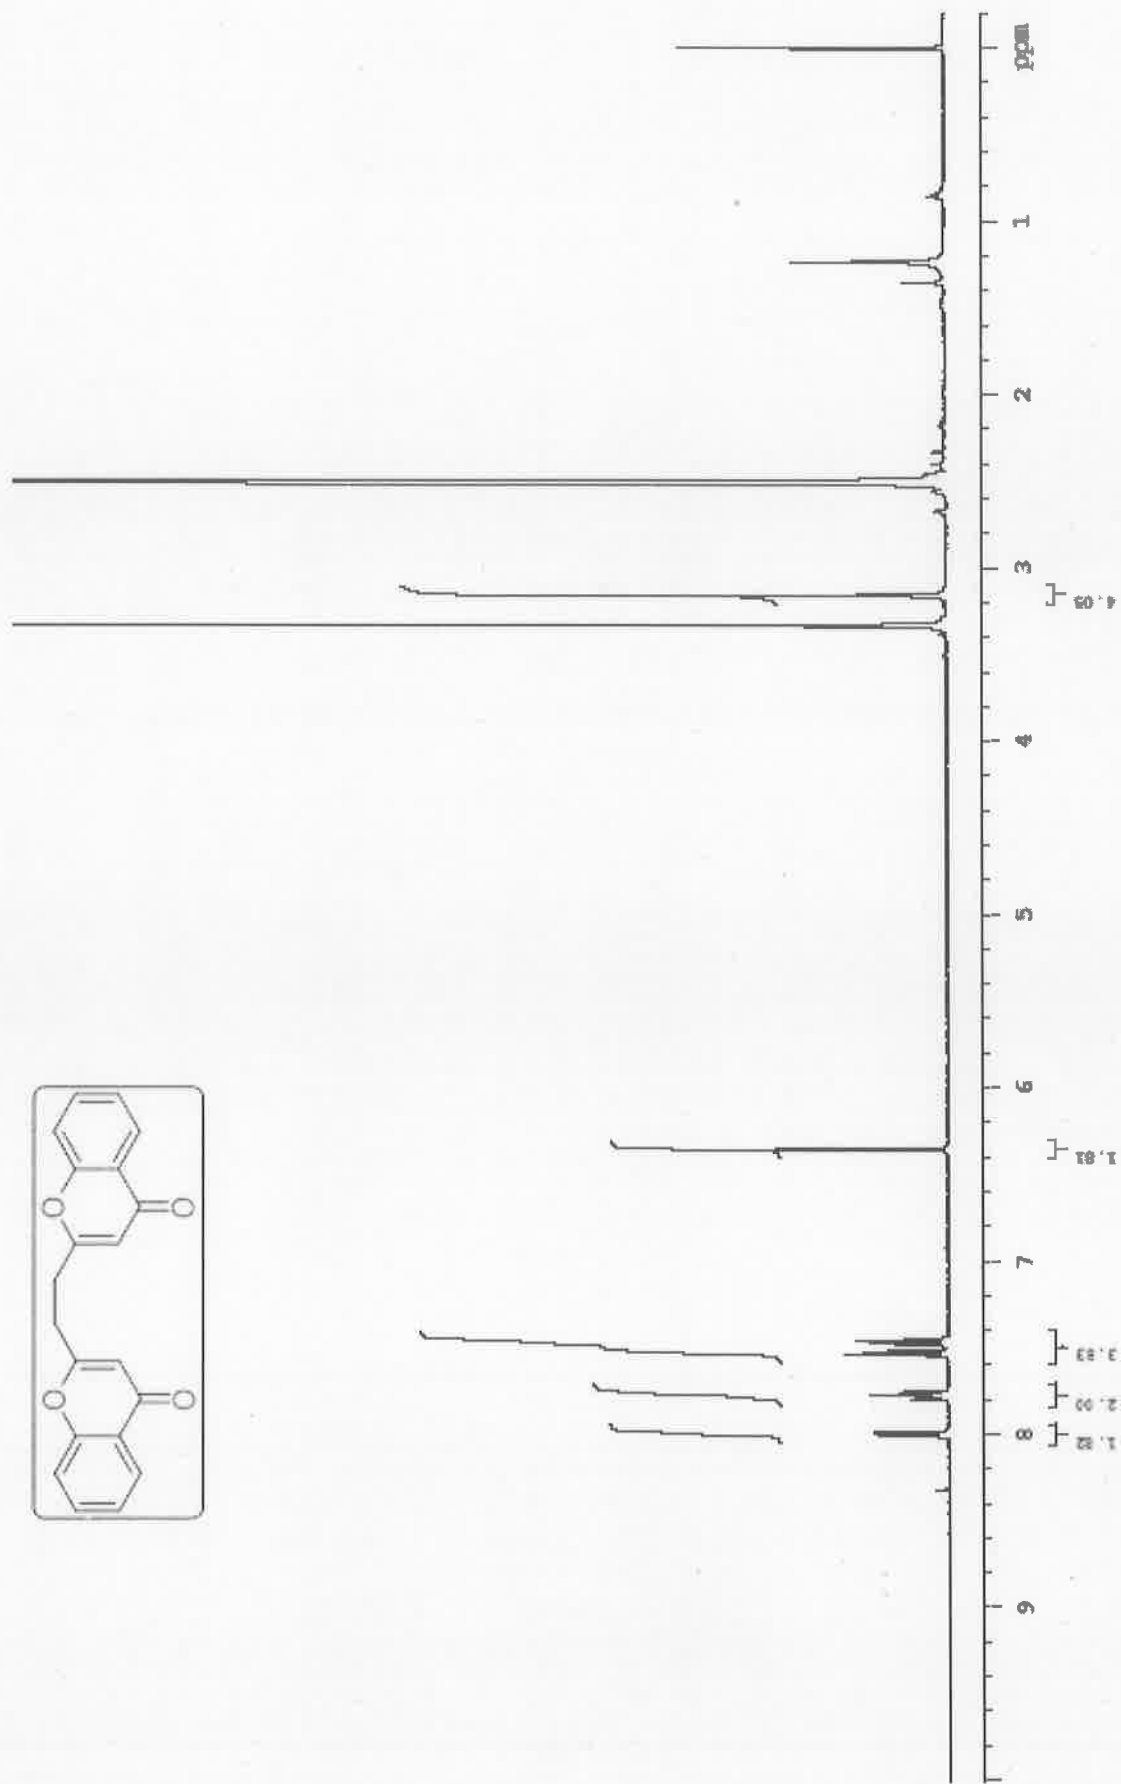



$^{13}\text{C}$  NMR (DMSO- $d_6$ ) of 2,2'-(Ethane-1,2-diyl)bis(4H-chromen-4-one) (**9a**)

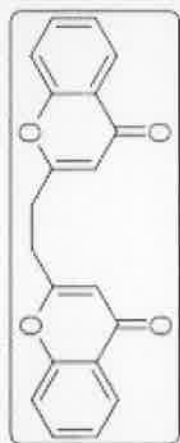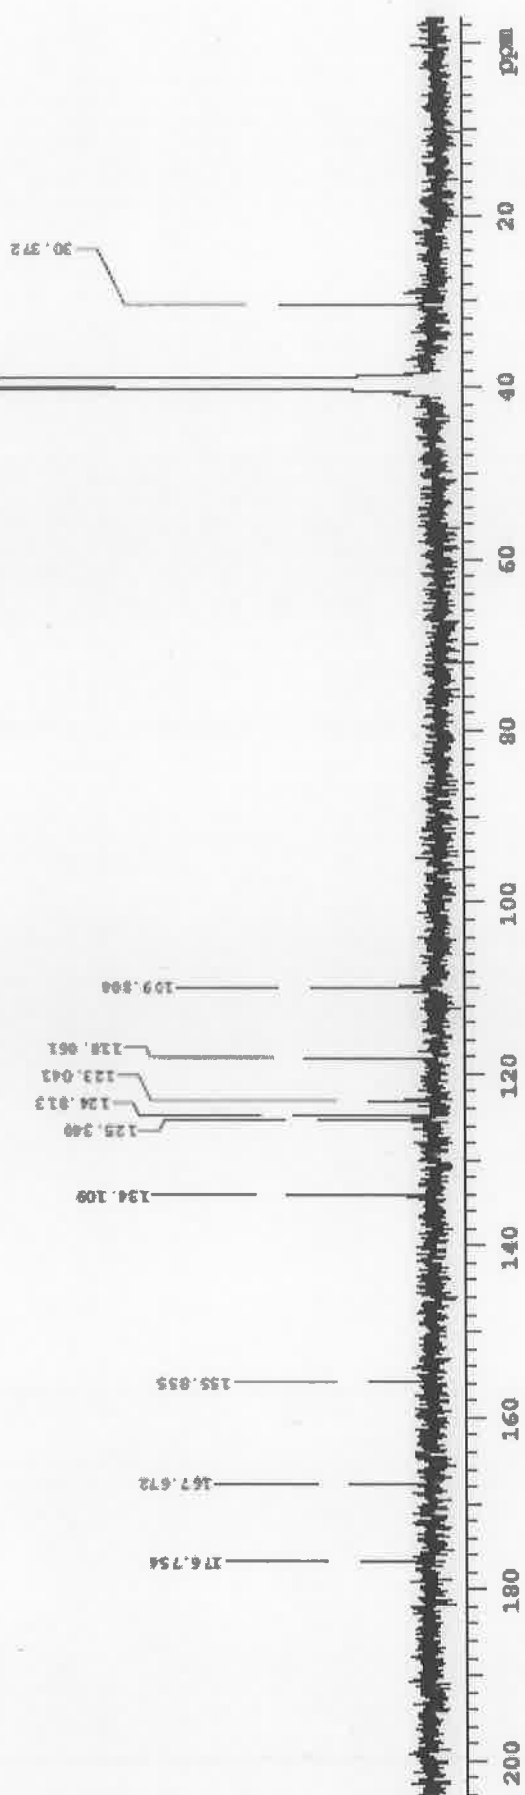

HRMS of 2,2'-(Ethane-1,2-diyl)bis(4H-chromen-4-one) (**9a**)

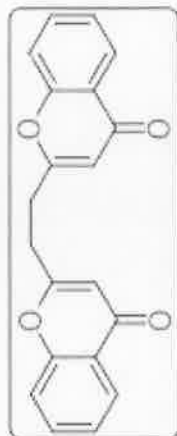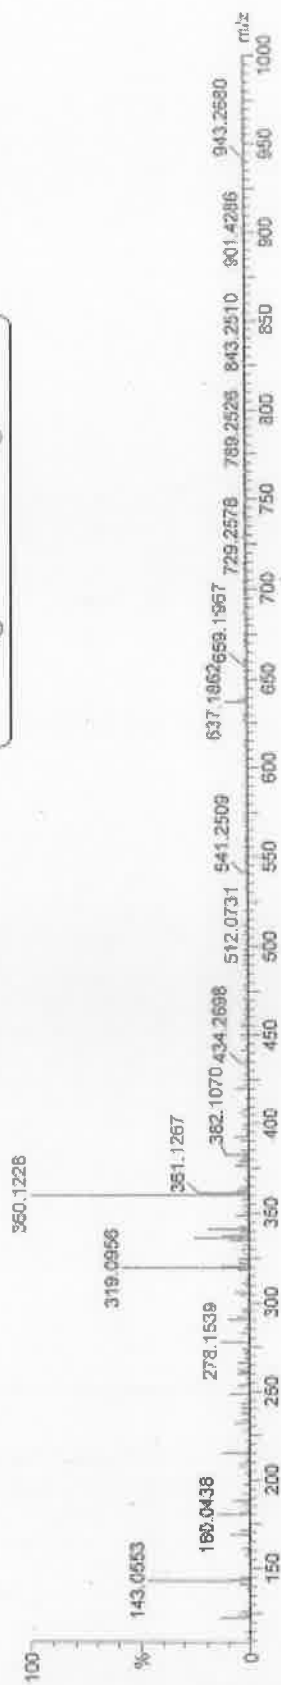

| Mass     | Calc. Mass | mba  | PPM  | DBE  | I-FIT | Formula    |
|----------|------------|------|------|------|-------|------------|
| 319.0956 | 319.0970   | -1.4 | -4.4 | 13.5 | 7.4   | C20 H15 O4 |
| Minimum: |            |      |      |      |       |            |
| Maximum: |            | 5.0  | 5.0  | 80.0 |       |            |

<sup>1</sup>H NMR (DMSO-d<sub>6</sub>) of 2,2'-(Ethane-1,2-diyl)bis(3-bromo-4H-chromen-4-one) (9b)

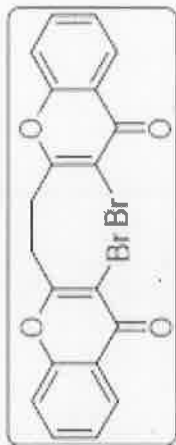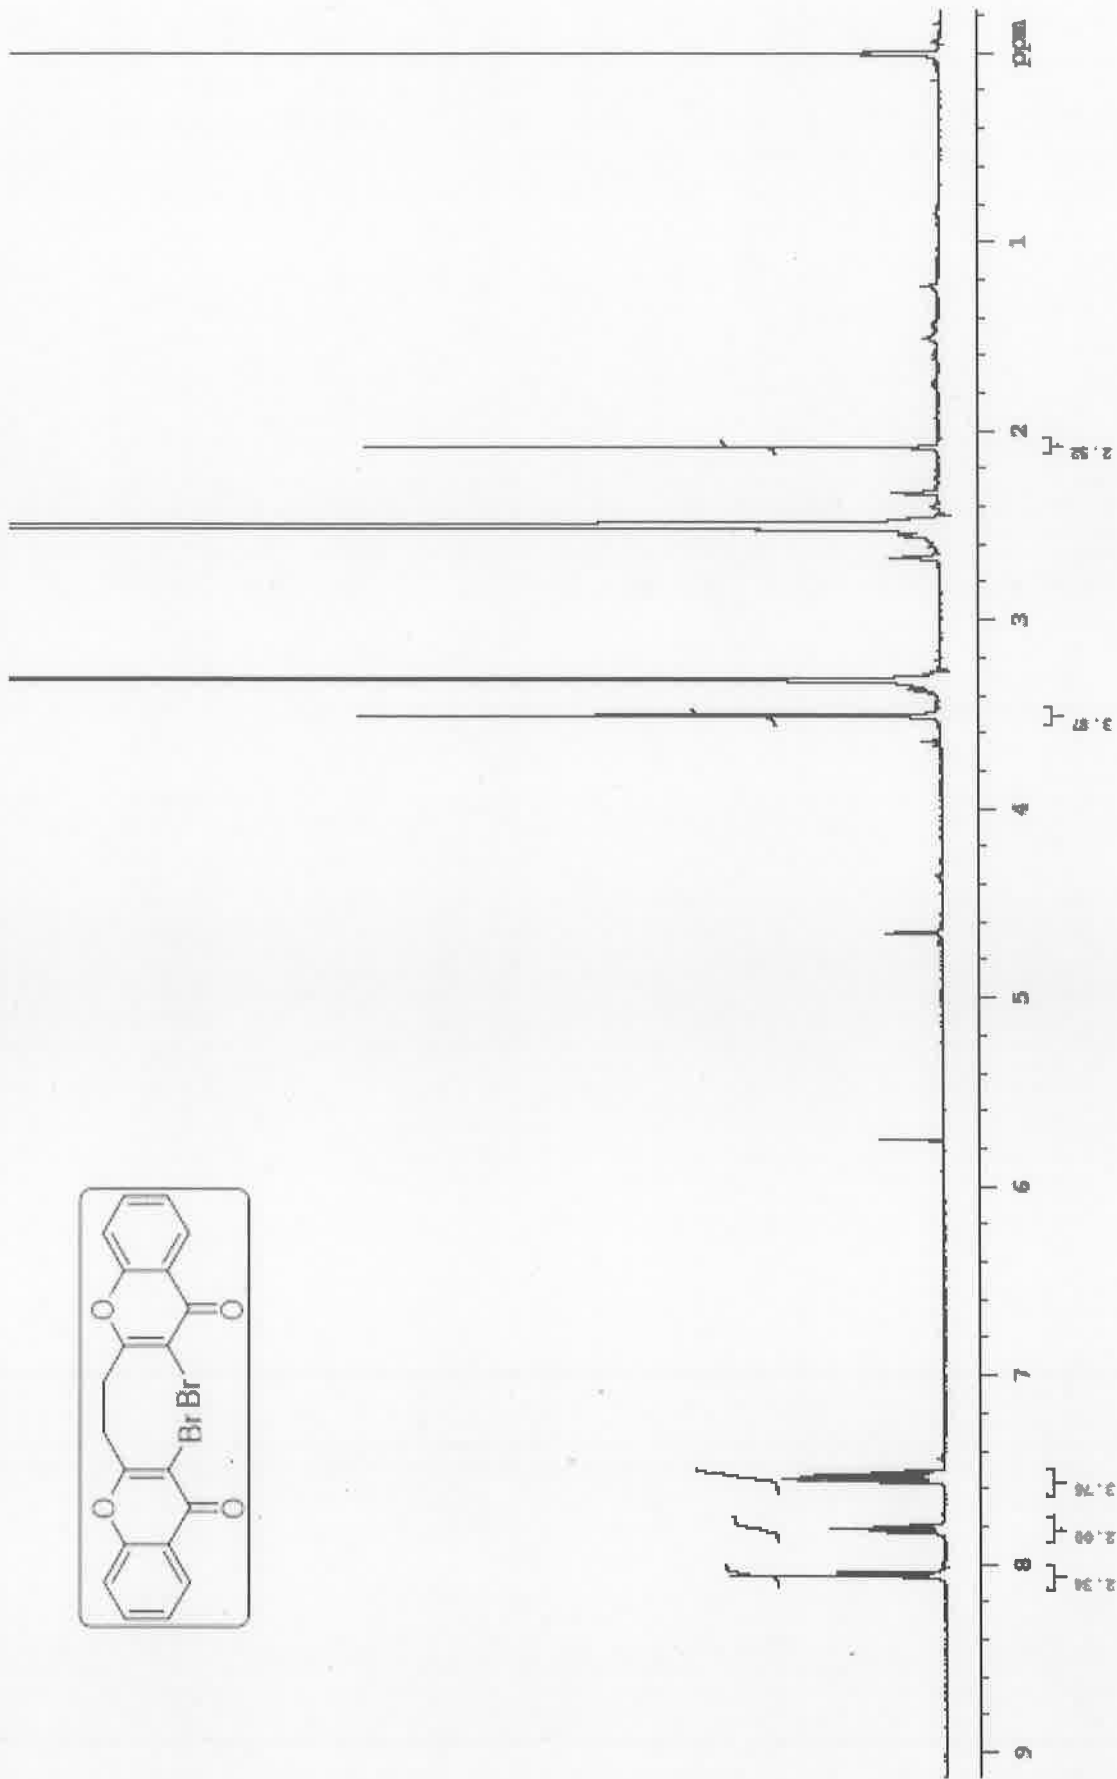

HRMS of 2,2'-(Ethane-1,2-diyl)bis(3-bromo-4H-chromen-4-one) (9b)

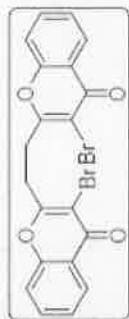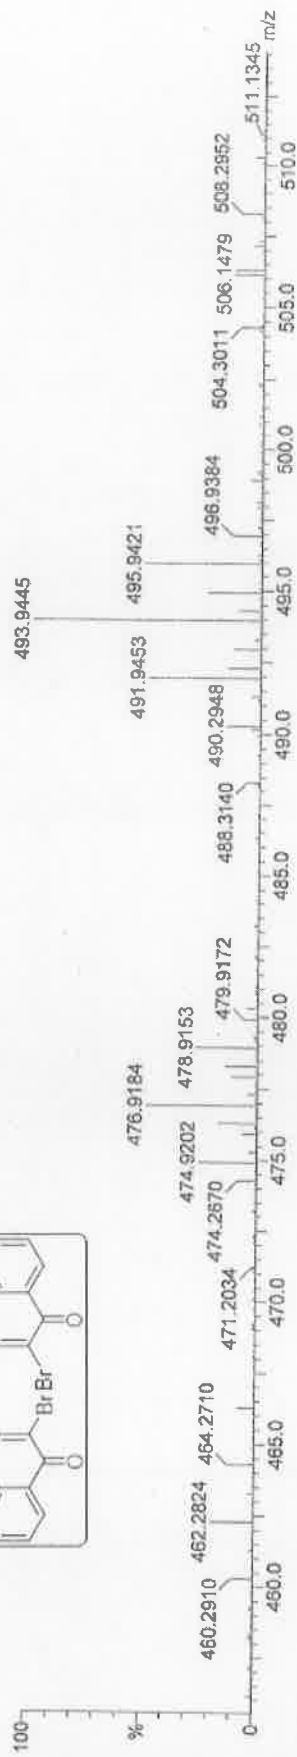

Minimum: -5.0  
Maximum: 80.0

| Mass     | Calc. Mass | mDa | PPM | DBE  | i-FIT | Formula        |
|----------|------------|-----|-----|------|-------|----------------|
| 474.9202 | 474.9181   | 2.1 | 4.4 | 13.5 | 1.1   | C20 H13 O4 Br2 |



$^{13}\text{C}$  NMR ( $\text{CDCl}_3$ ) of 2,2'-(Ethane-1,2-diyl)bis(3-chloro-4H-chromen-4-one) (9c)

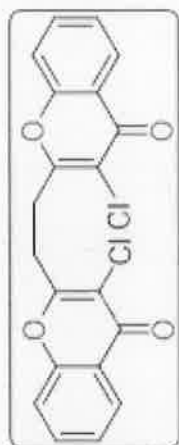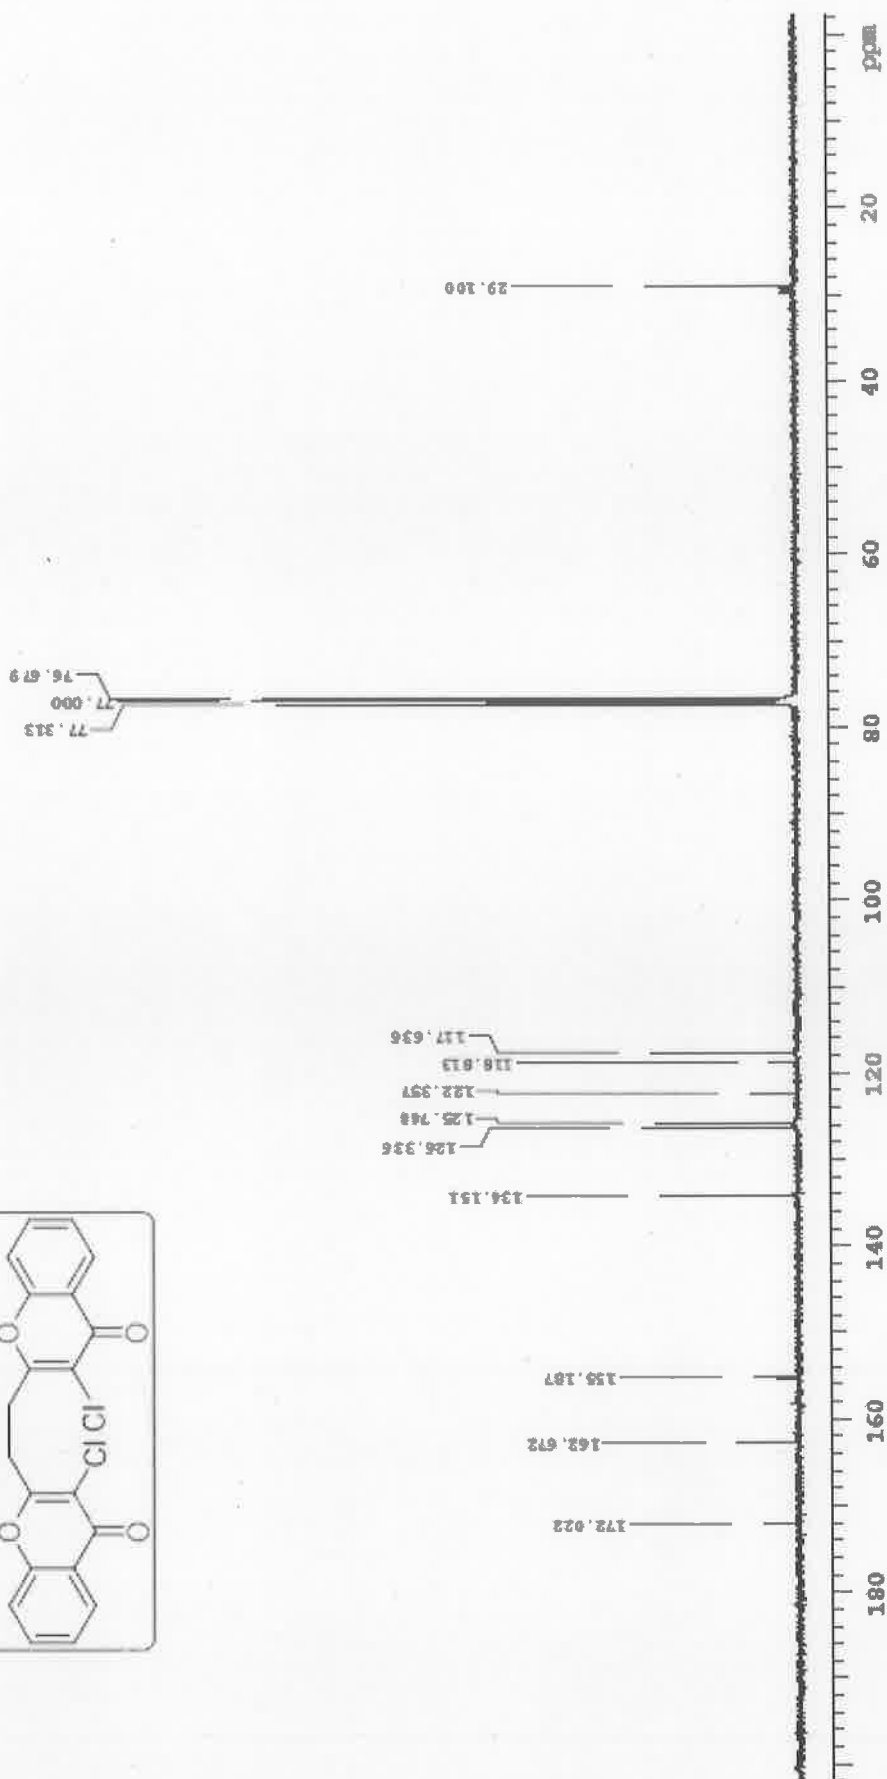

HRMS of 2,2'-(ethane-1,2-diyl)bis(3-chloro-4H-chromen-4-one) (9c)

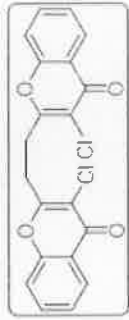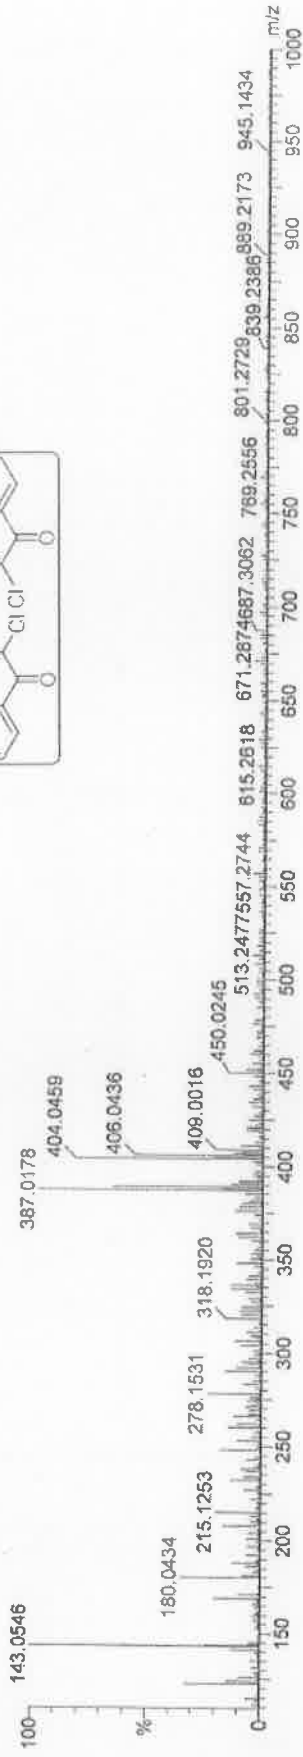

Minimum:  
Maximum:

-5.0  
80.0

| Mass     | Calc. Mass | mDa  | PPM  | DBE  | i-FIT | Formula                                                        |
|----------|------------|------|------|------|-------|----------------------------------------------------------------|
| 387.0178 | 387.0191   | -1.3 | -3.4 | 13.5 | 6.6   | C <sub>20</sub> H <sub>13</sub> O <sub>4</sub> Cl <sub>2</sub> |

387.0178 387.0191 -1.3 -3.4 13.5 6.6 C<sub>20</sub>H<sub>13</sub>O<sub>4</sub>Cl<sub>2</sub>





<sup>13</sup>C NMR (CDCl<sub>3</sub>) of 2,2'-(Ethane-1,2-diyl)bis(3-bromo-6-methyl-4H-chromen-4-one) (9d)

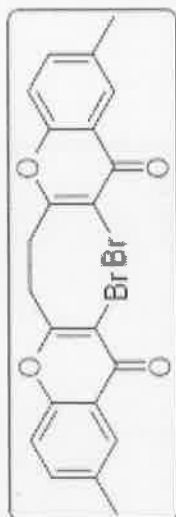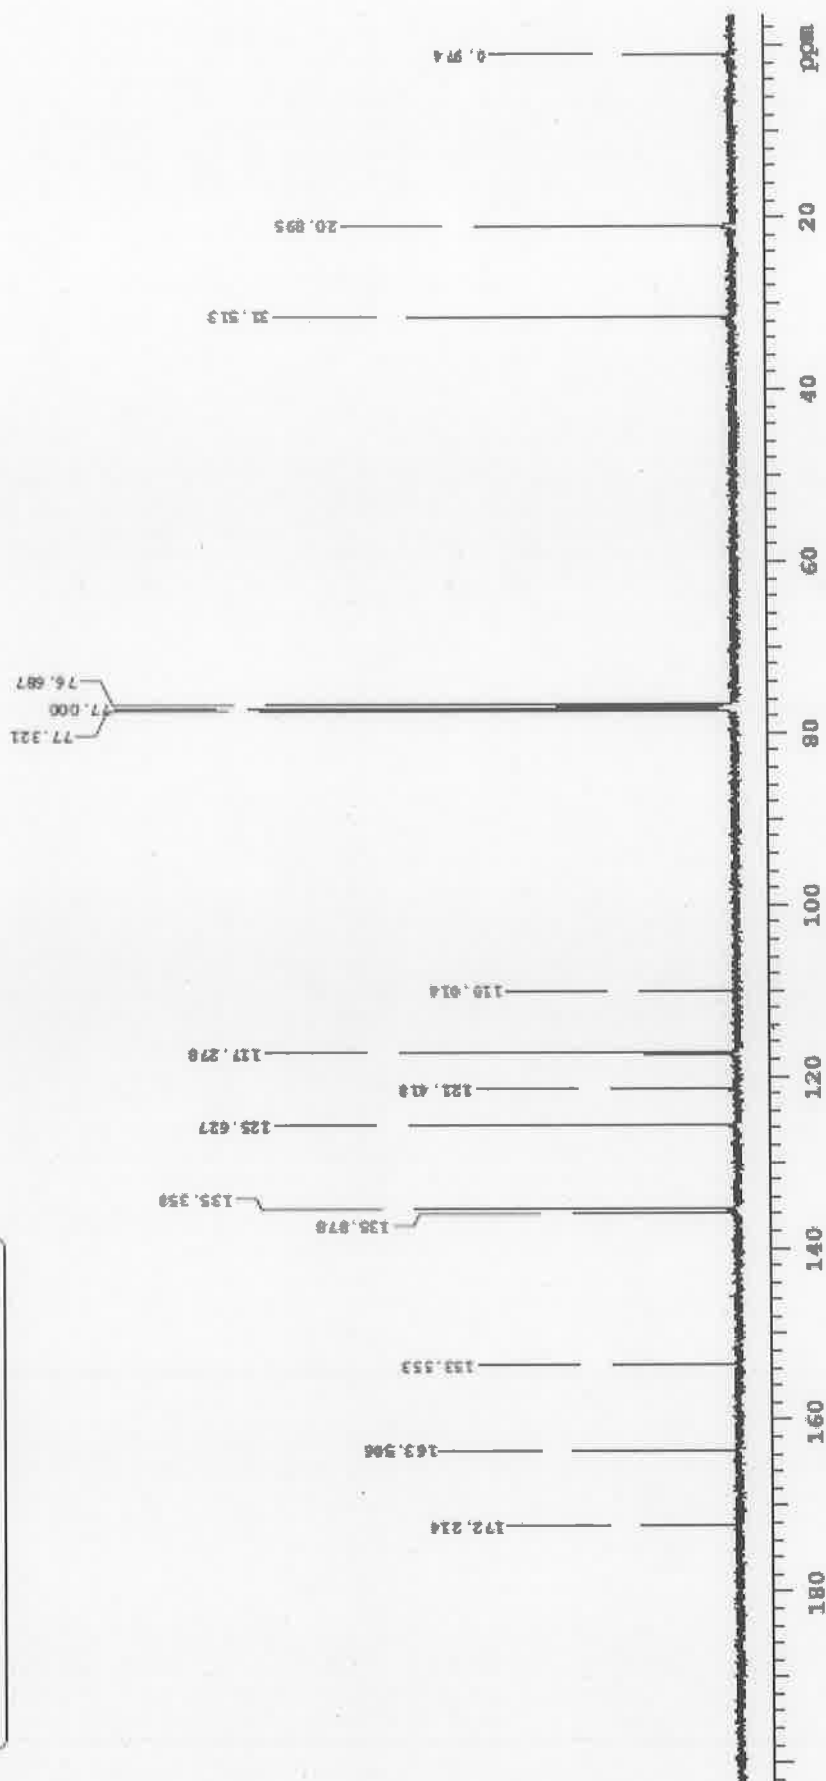

HRMS of 2,2'-(Ethane-1,2-diyl)bis(3-bromo-6-methyl-4H-chromen-4-one) (9d)

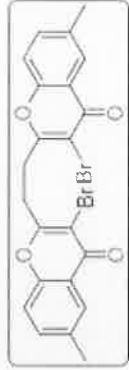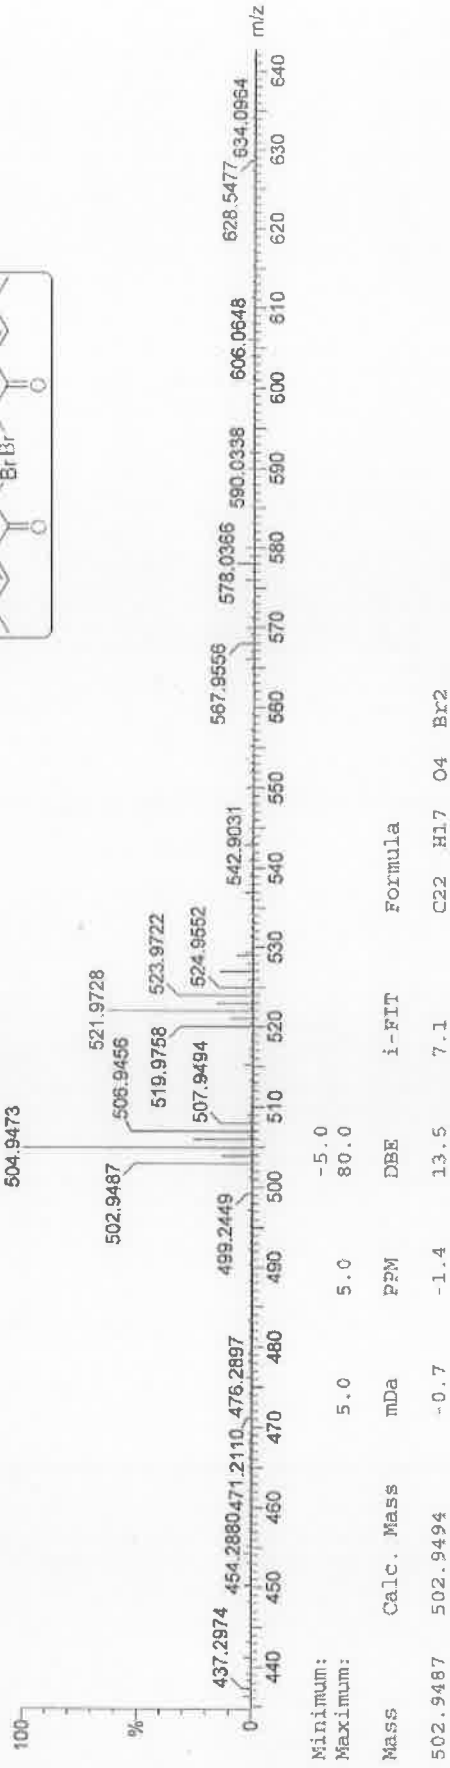

Minimum: -5.0  
 Maximum: 80.0

| Mass     | Calc. Mass | mDa  | PPM  | DBE  | i-FIT | Formula        |
|----------|------------|------|------|------|-------|----------------|
| 502.9487 | 502.9494   | -0.7 | -1.4 | 13.5 | 7.1   | C22 H17 O4 Br2 |



$^{13}\text{C}$  NMR ( $\text{CDCl}_3$ ) of 2,2'-(Ethane-1,2-diyl)bis(6-bromo-4H-chromen-4-one) (**9e**)

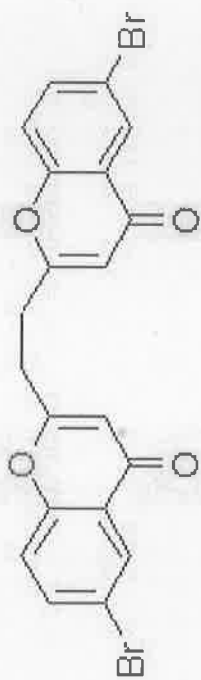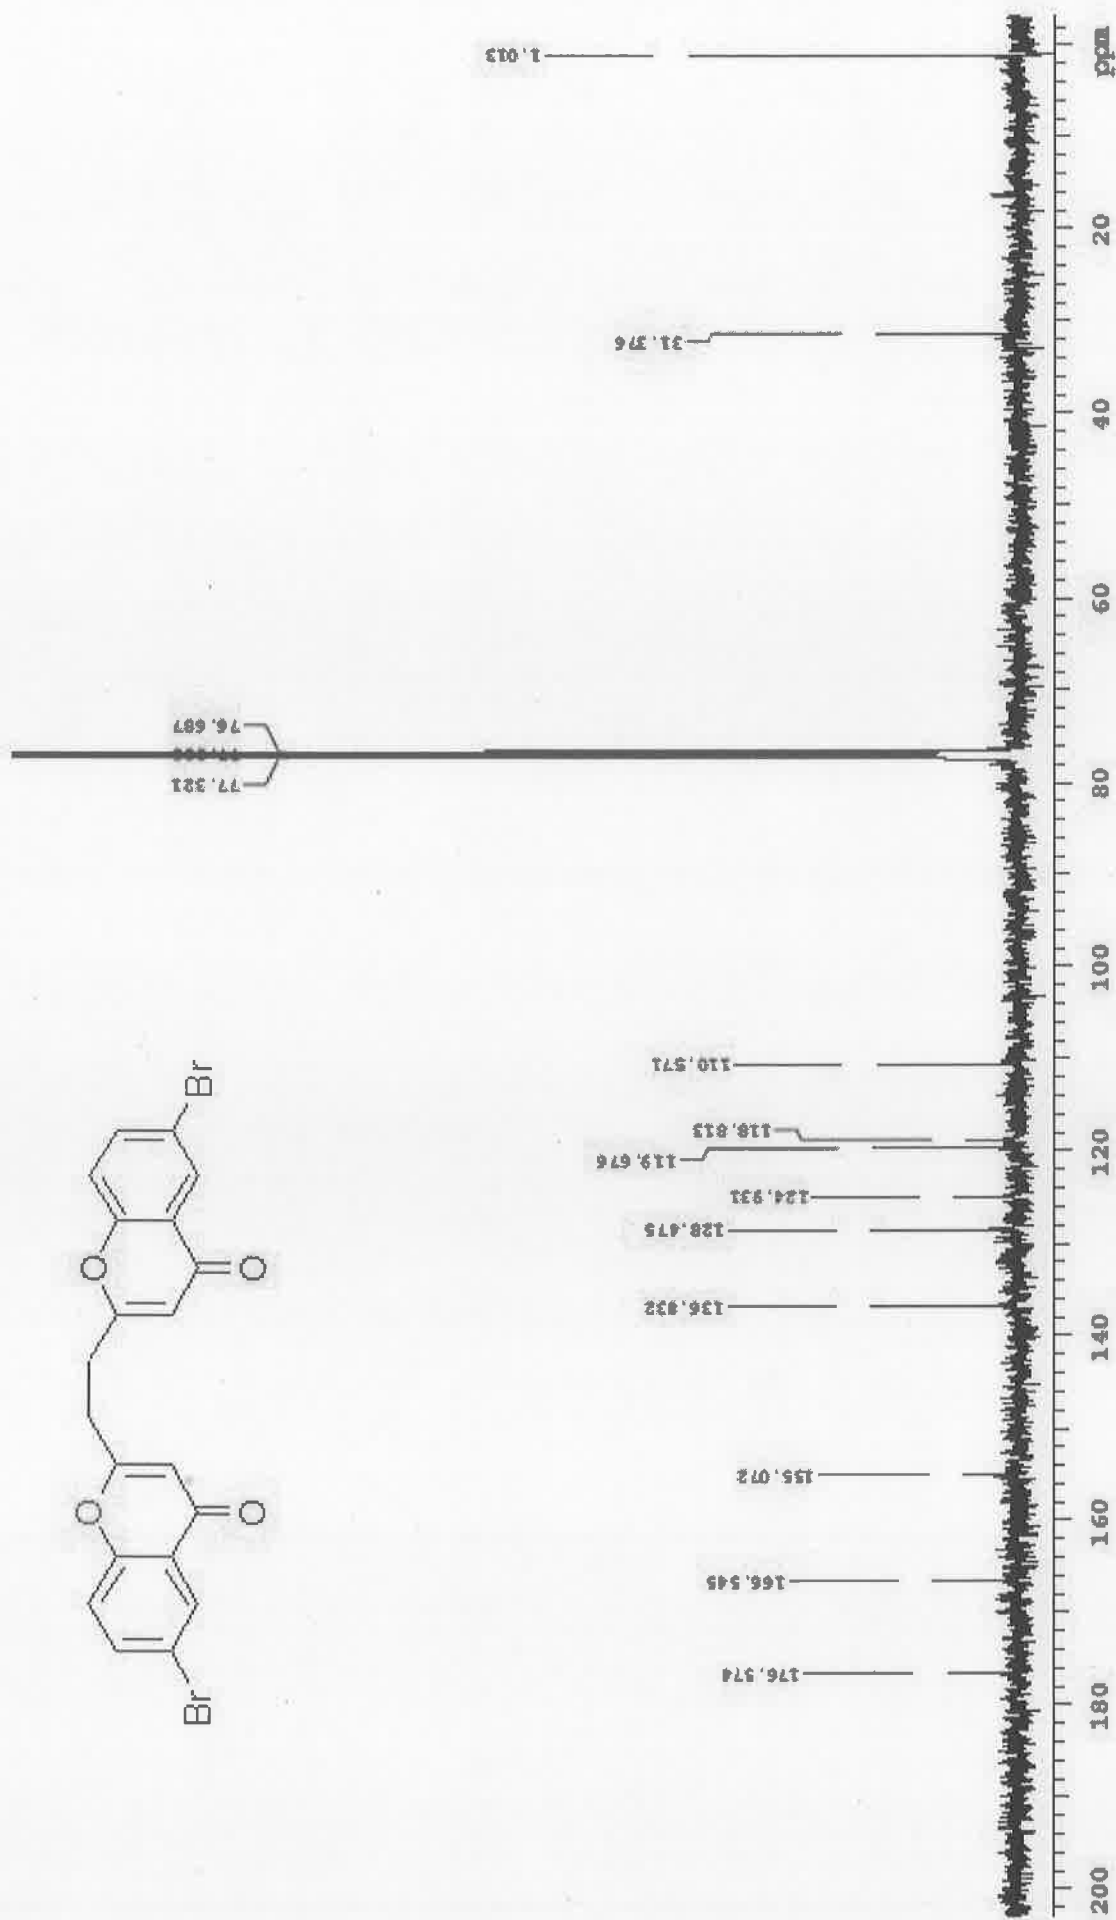

HRMS of 2,2'-(Ethane-1,2-diyl)bis(6-bromo-4H-chromen-4-one) (**9e**)

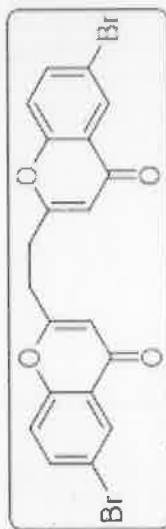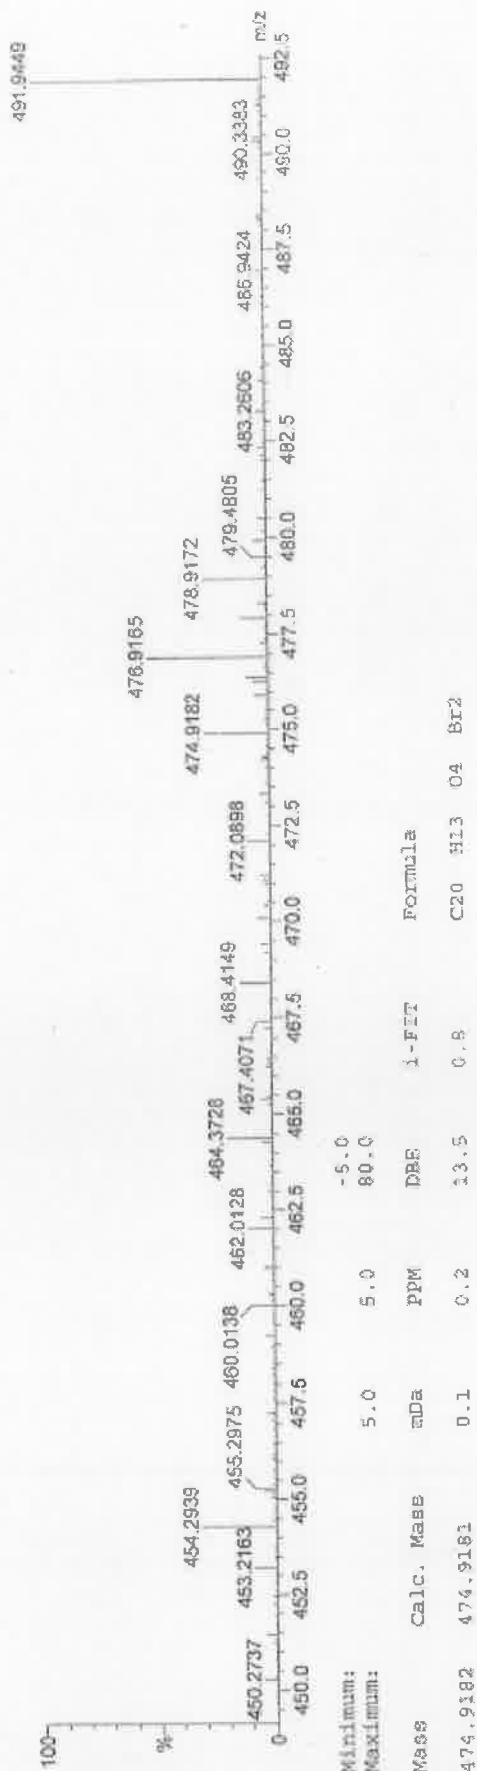

| Mass     | Calc. Mass | mDa | PPM  | DBE  | i-FIT | Formula                                                        |
|----------|------------|-----|------|------|-------|----------------------------------------------------------------|
| 474.9182 | 474.9181   | 0.1 | 0.2  | 13.5 | 0.8   | C <sub>20</sub> H <sub>13</sub> O <sub>4</sub> Br <sub>2</sub> |
|          |            |     |      |      |       |                                                                |
| Minimum: |            | 5.0 | 5.0  | -5.0 |       |                                                                |
| Maximum: |            |     | 80.0 | 80.0 |       |                                                                |

$^1\text{H}$  NMR ( $\text{CDCl}_3$  +  $\text{DMSO-}d_6$ ) of 2,2'-(Ethane-1,2-diyl)bis(6-chloro-4H-chromen-4-one) (9f)

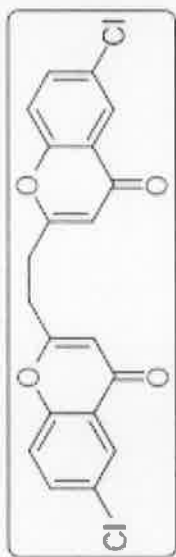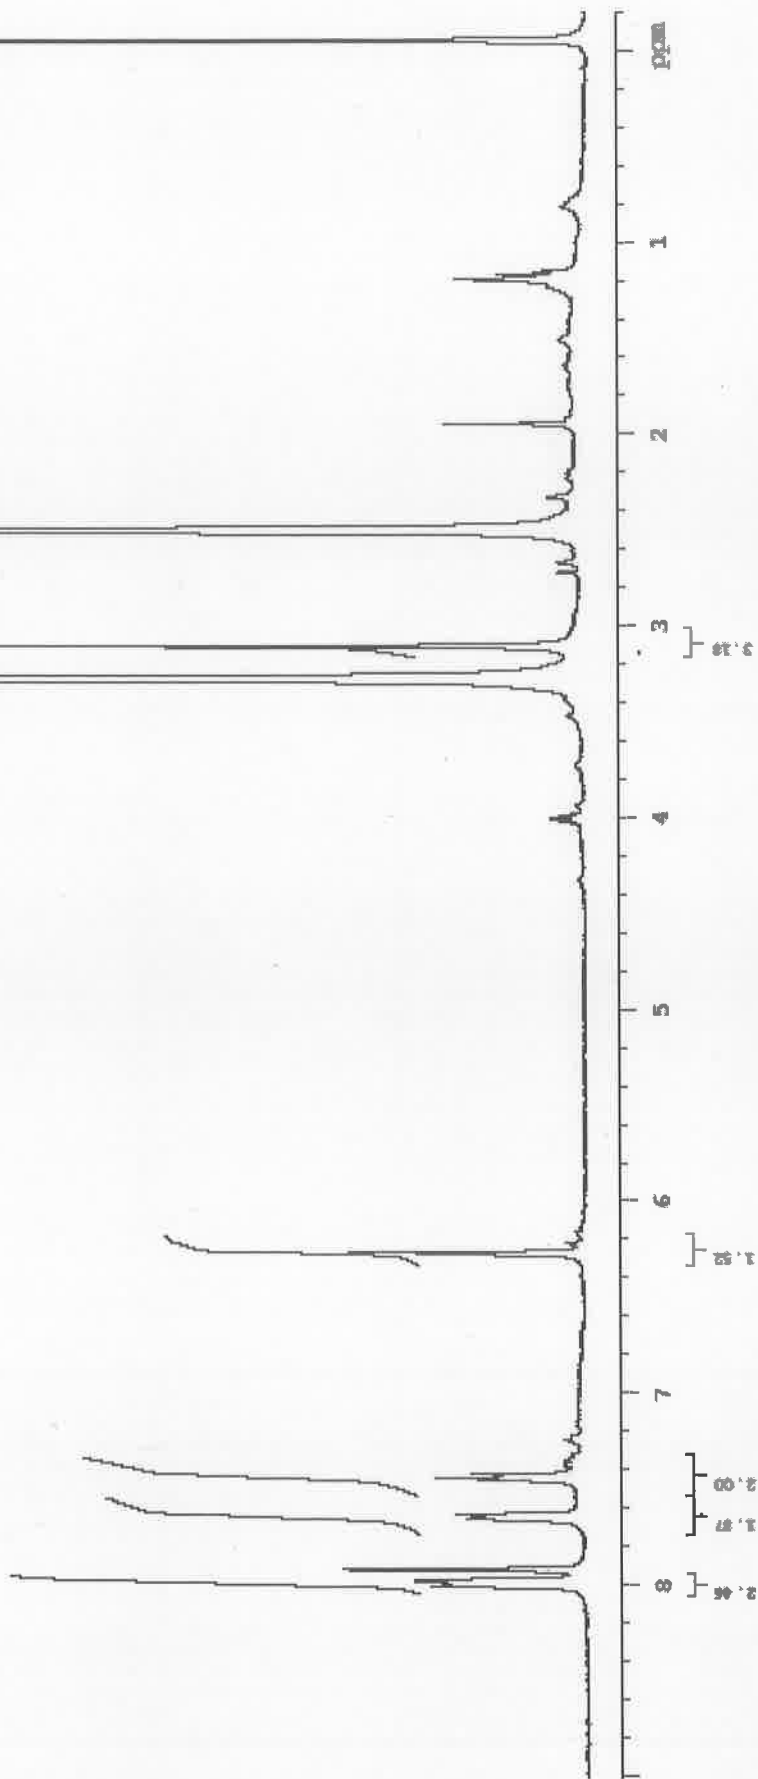

HRMS of 2,2'-(Ethane-1,2-diyl)bis(6-chloro-4H-chromen-4-one) (9f)

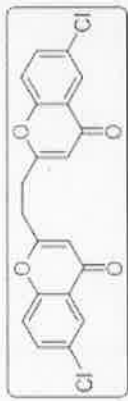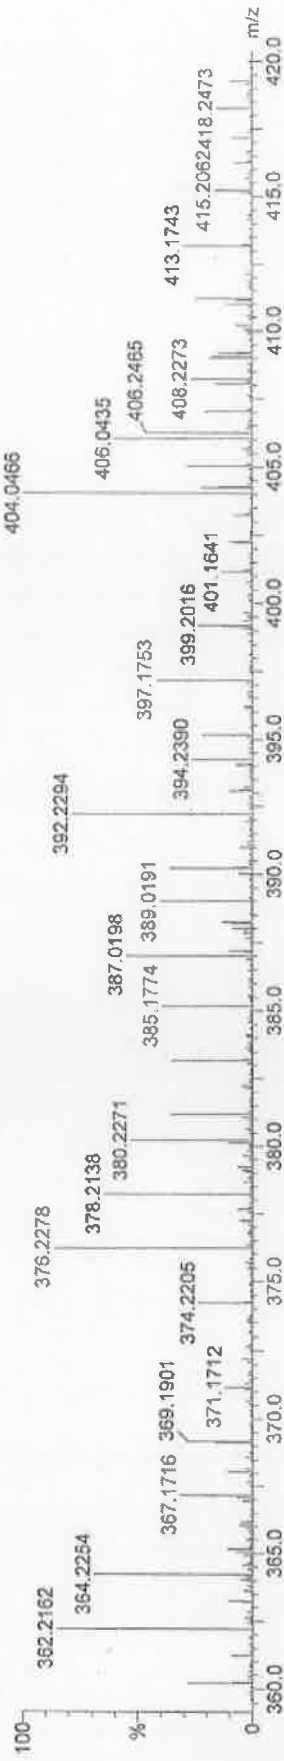

Minimum: 5.0 5.0 -5.0  
 Maximum: 80.0 80.0 80.0

| Mass     | Calc. Mass | mDa | PPM | DBE  | i-FIT | Formula        |
|----------|------------|-----|-----|------|-------|----------------|
| 387.0198 | 387.0191   | 0.7 | 1.8 | 13.5 | 6.3   | C20 H13 O4 Cl2 |

<sup>1</sup>H NMR (DMSO-d<sub>6</sub>) of 2,2'-(Ethane-1,2-diyl)bis(6-nitro-4H-chromen-4-one) (9g)

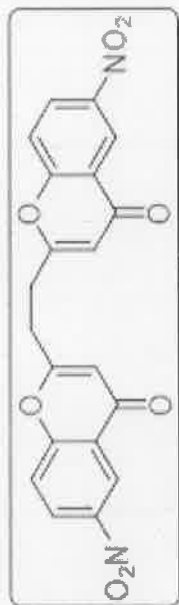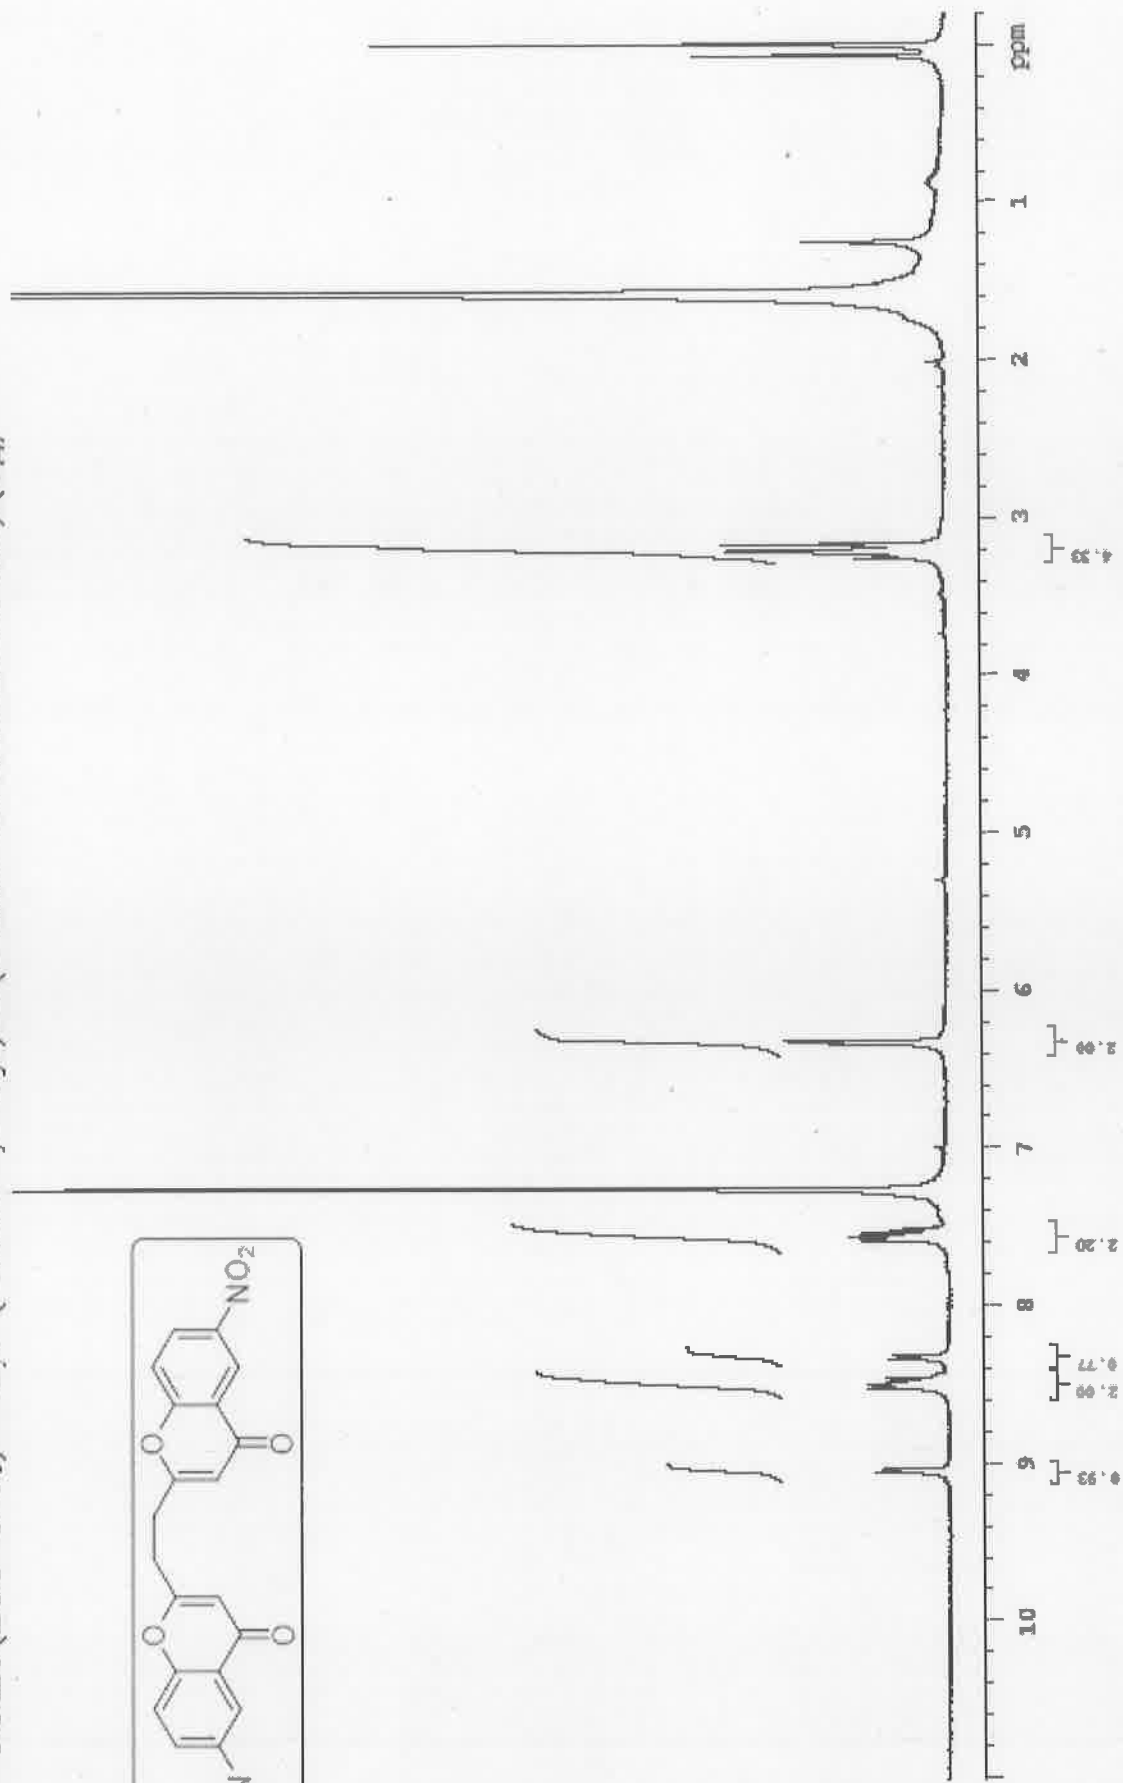



HRMS of 2,2'-(Ethane-1,2-diyl)bis(6-nitro-4H-chromen-4-one) (9g)

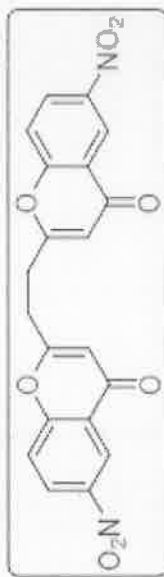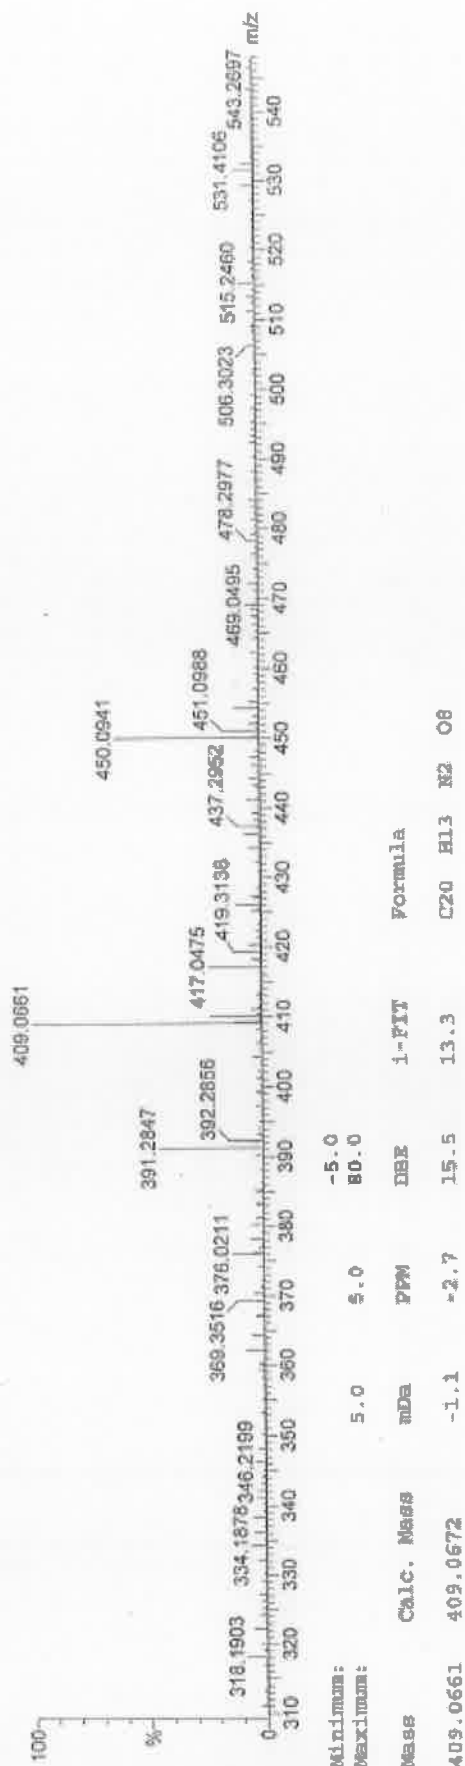

| Mass     | Calc. Mass | MDA  | PPM  | DBE  | Formula       |
|----------|------------|------|------|------|---------------|
| 409.0661 | 409.0672   | -1.1 | +2.7 | 15.5 | C20 H13 N2 O8 |
| Minimum: |            | 5.0  | 5.0  | -5.0 |               |
| Maximum: |            |      |      | 80.0 |               |

<sup>1</sup>H NMR (DMSO-d<sub>6</sub>) of 2,2'-(Ethane-1,2-diyl)bis(6-methyl-4H-chromen-4-one) (**9h**)

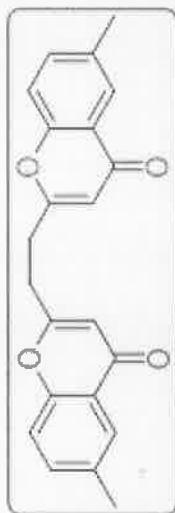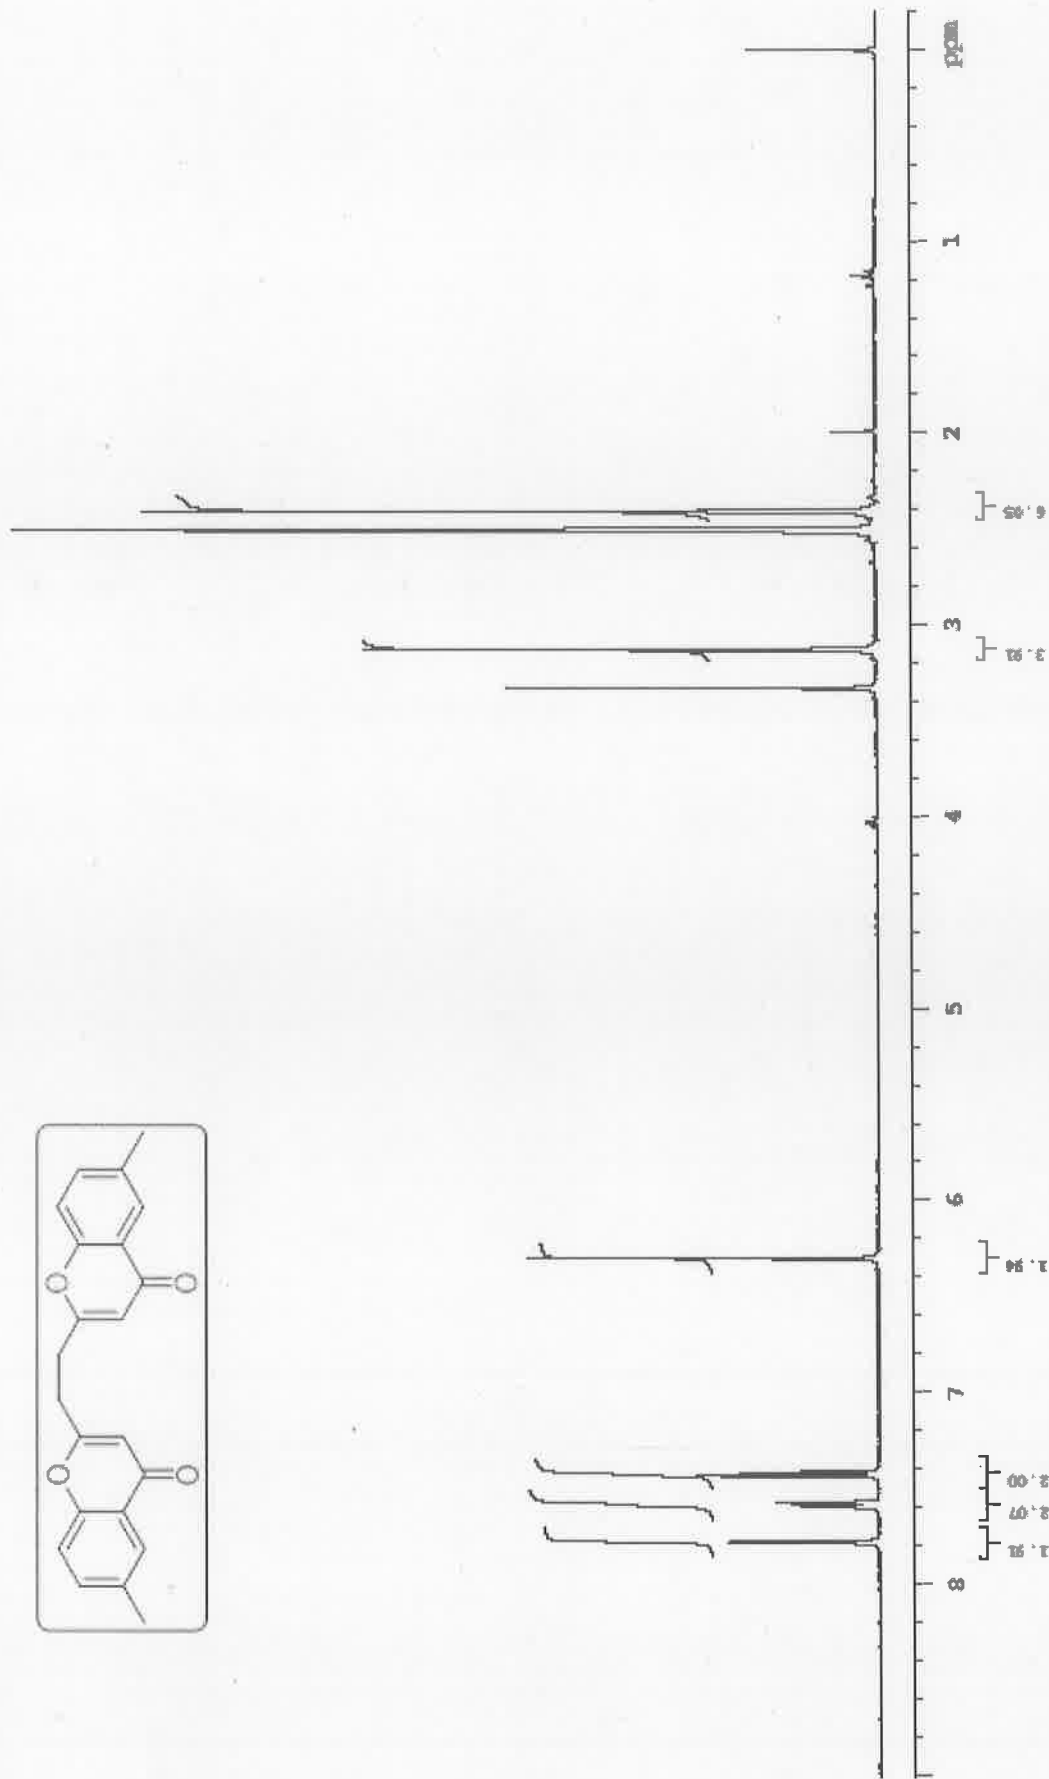

<sup>13</sup>C NMR (DMSO-d<sub>6</sub>) of 2,2'-(Ethane-1,2-diyl)bis(6-methyl-4H-chromen-4-one) (9h)

30.400  
20.389  
0.038

176.732  
167.479  
154.147  
135.103  
134.853  
124.112  
122.749  
117.864  
109.638

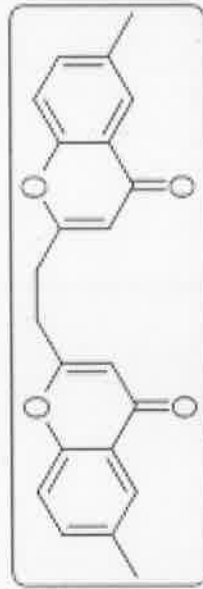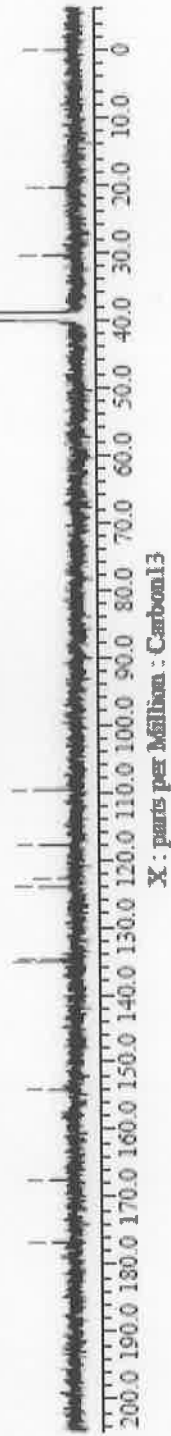

HRMS of 2,2'-(Ethane-1,2-diyl)bis(6-methyl-4H-chromen-4-one) (9h)

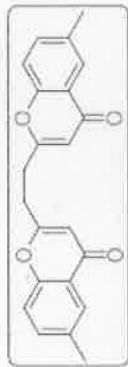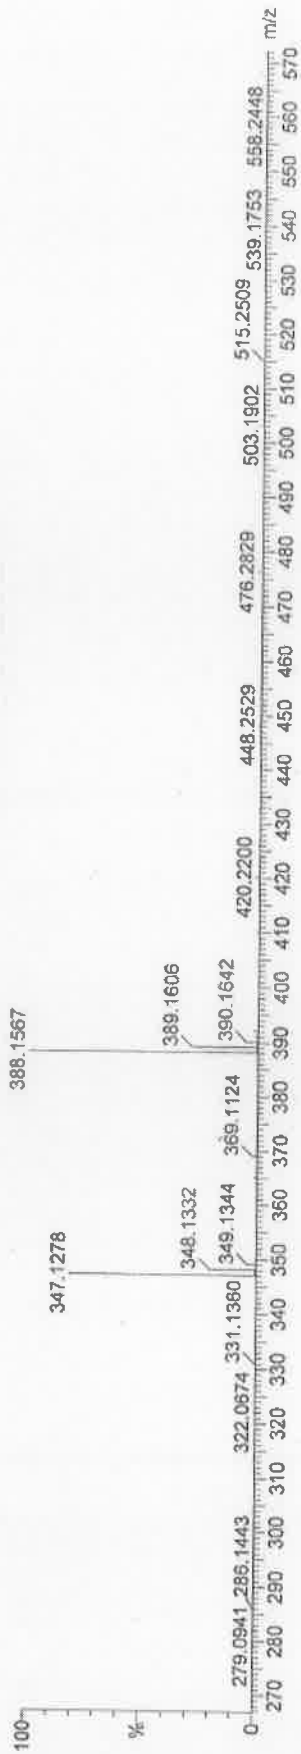

Minimum:  
Maximum:

-5.0  
80.0

| Mass     | Calc. Mass | mDa  | PPM  | DBE  | i-FIT | Formula    |
|----------|------------|------|------|------|-------|------------|
| 347.1278 | 347.1283   | -0.5 | -1.4 | 13.5 | 114.3 | C22 H19 O4 |

<sup>1</sup>H NMR (CDCl<sub>3</sub>) of 2,2'-(Ethane-1,2-diyl)bis(6-(chloromethyl)-4H-chromen-4-one) (9i)

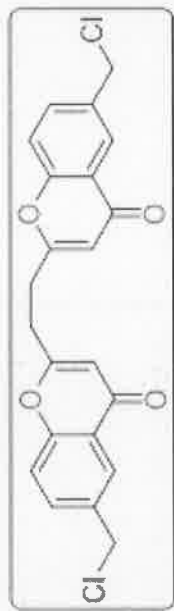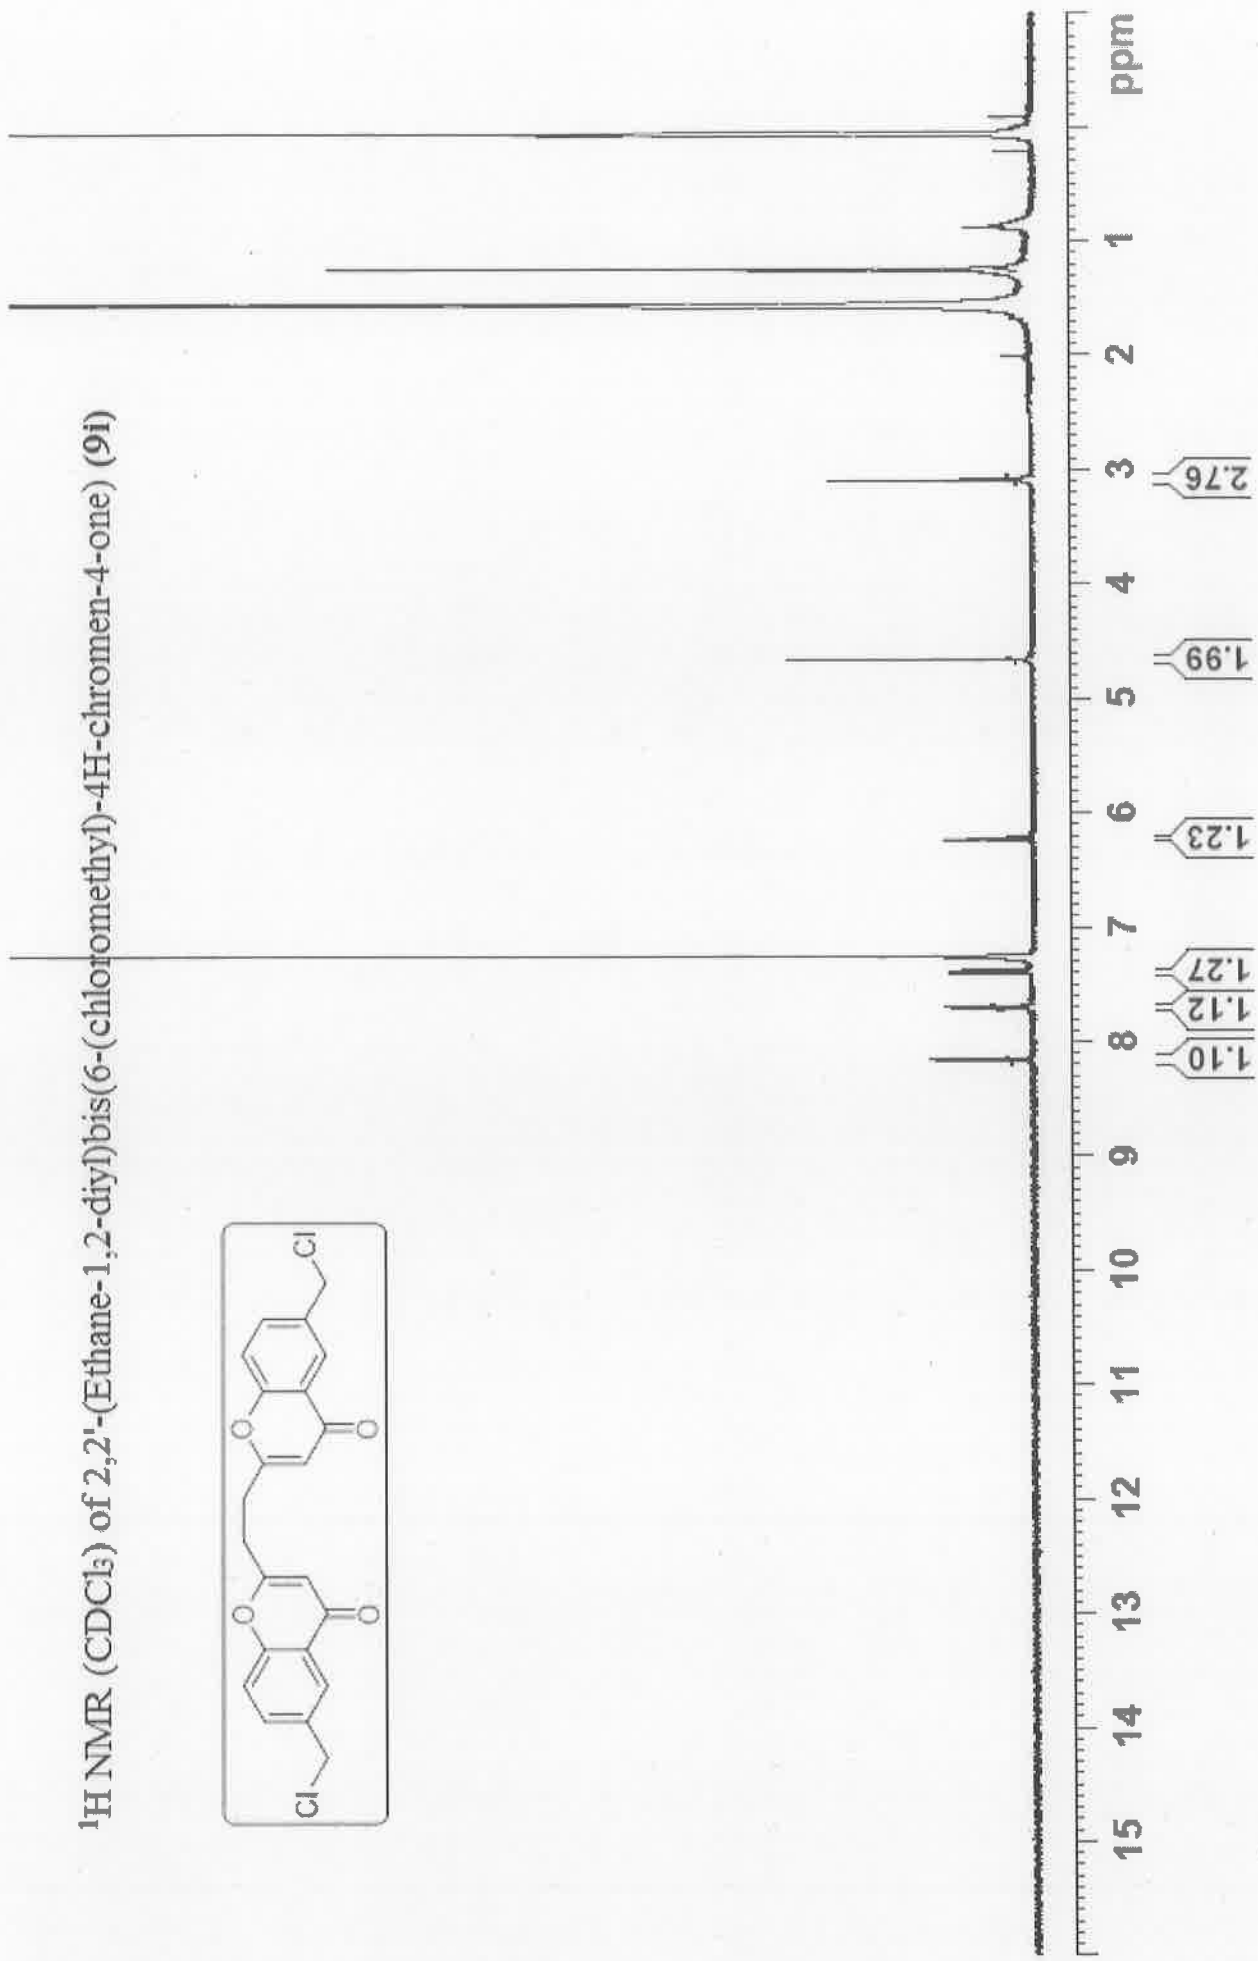

$^{13}\text{C}$  NMR ( $\text{CDCl}_3$ ) of 2,2'-(Ethane-1,2-diyl)bis(6-(chloromethyl)-4H-chromen-4-one) (**9i**)

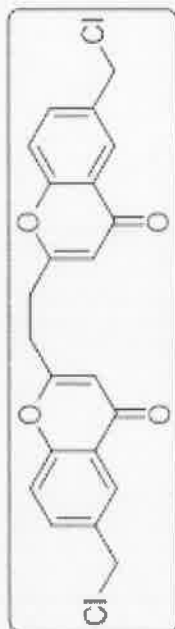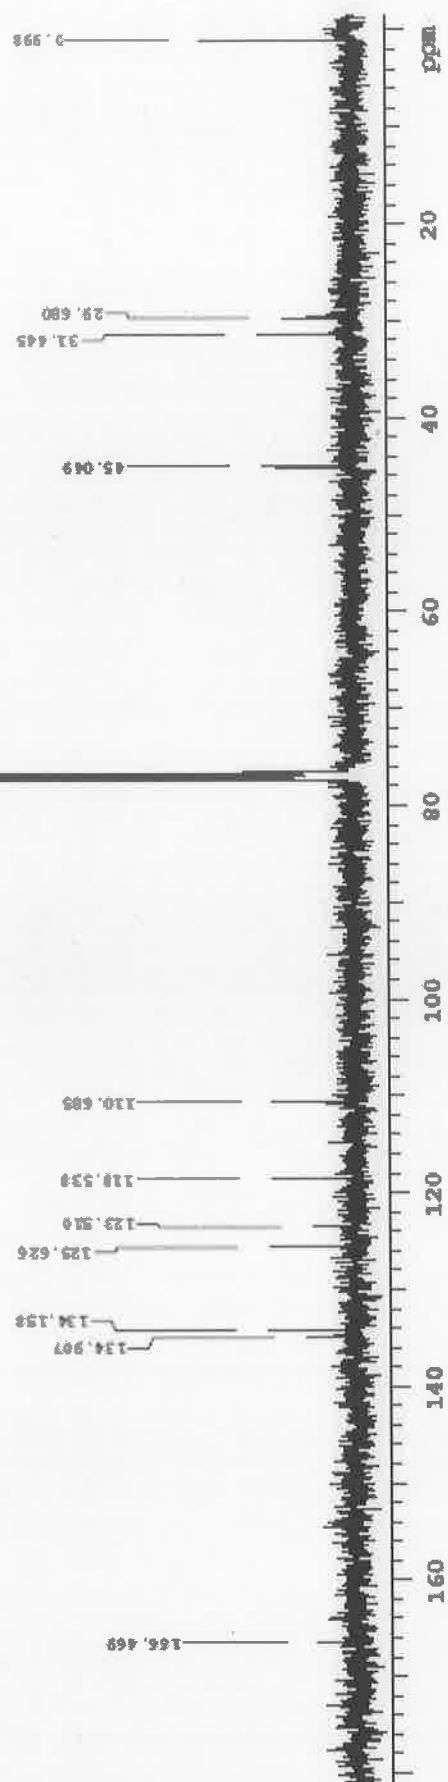

HRMS of 2,2'-(Ethane-1,2-diyl)bis(6-(chloromethyl)-4H-chromen-4-one) (9i)

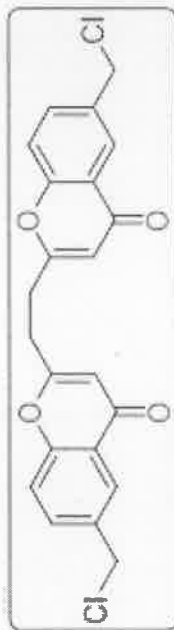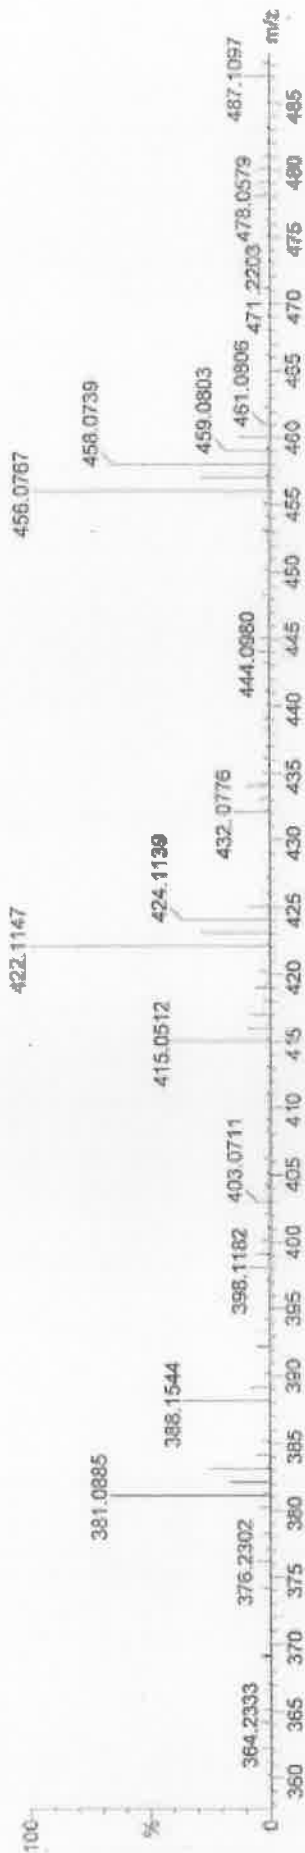

Minimum:  
Maximum:

-5.0  
80.0

| Mass     | Calc. Mass | mDa | PPM | DBE  | 1-FIT | Formula        |
|----------|------------|-----|-----|------|-------|----------------|
| 415.0512 | 415.0504   | 0.8 | 1.9 | 13.5 | 242.7 | C22 H17 O4 Cl2 |

$^1\text{H}$  NMR ( $\text{CDCl}_3$ ) of 2,2'-(1,2-dihydroxyethane-1,2-diyl)bis(4H-chromen-4-one) (**11**)

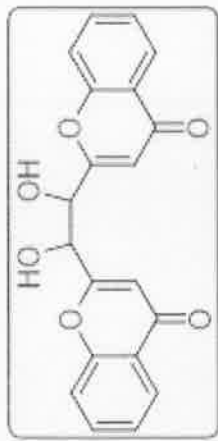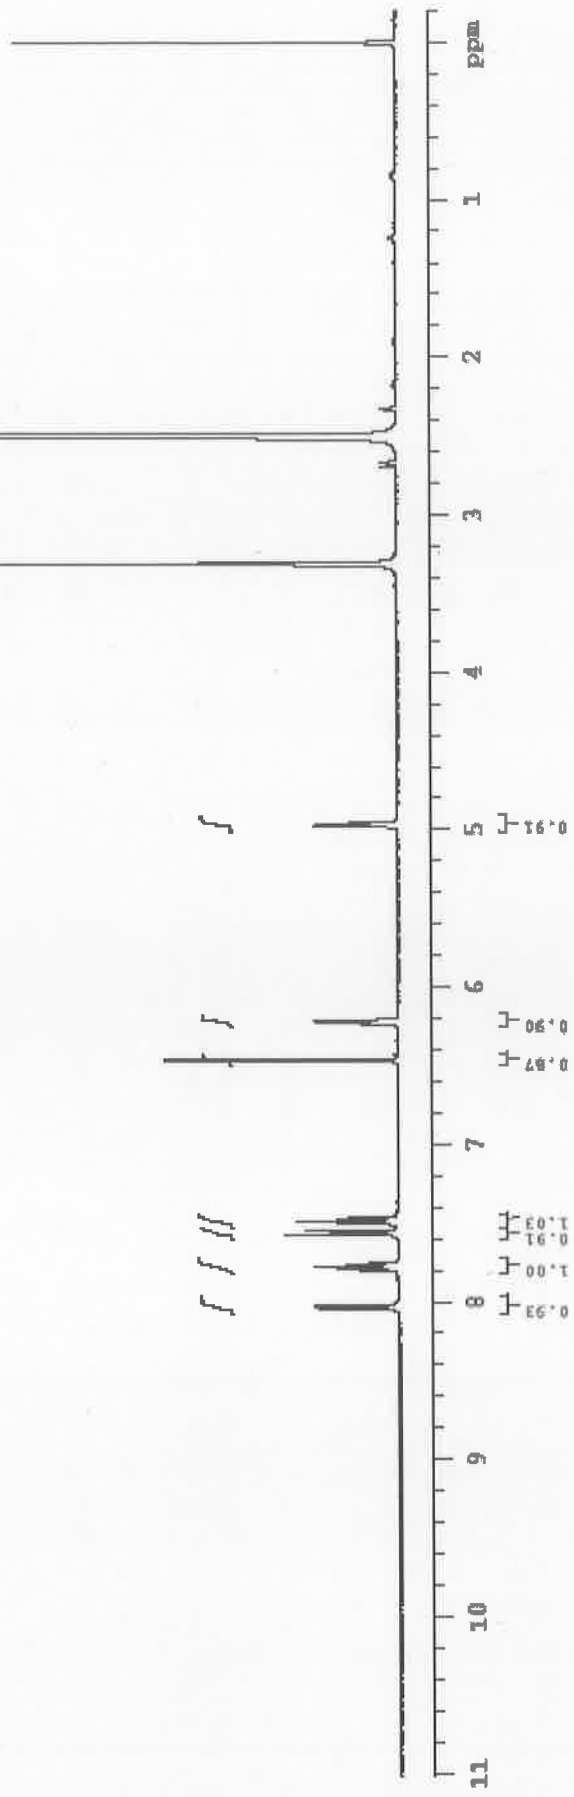



$^{13}\text{C}$  NMR (DMSO- $d_6$ ) of 2,2'-(1,2-dihydroxyethane-1,2-diyl)bis(4H-chromen-4-one) (**11**)

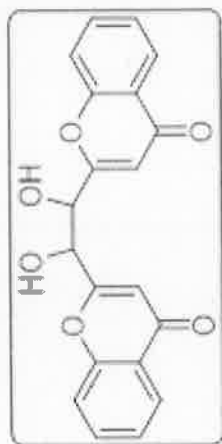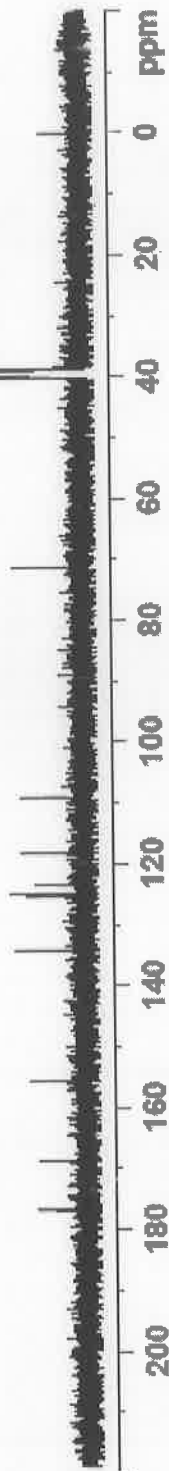

MASS of 2,2'-(1,2-dihydroxyethane-1,2-diyl)bis(4H-chromen-4-one) (11)

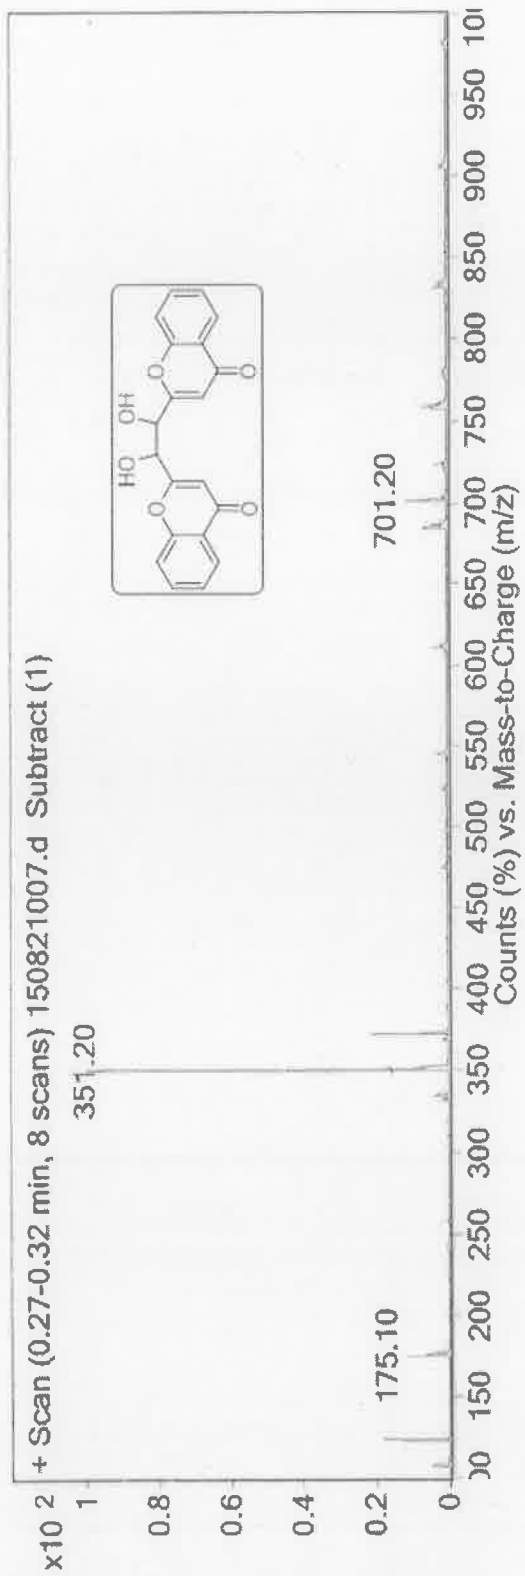



<sup>13</sup>C NMR (CDCl<sub>3</sub>) of 3-Bromo-6-methyl-2-(2-(4-oxo-4H-chromen-2-yl)ethyl)-4H-chromen-4-one (12)

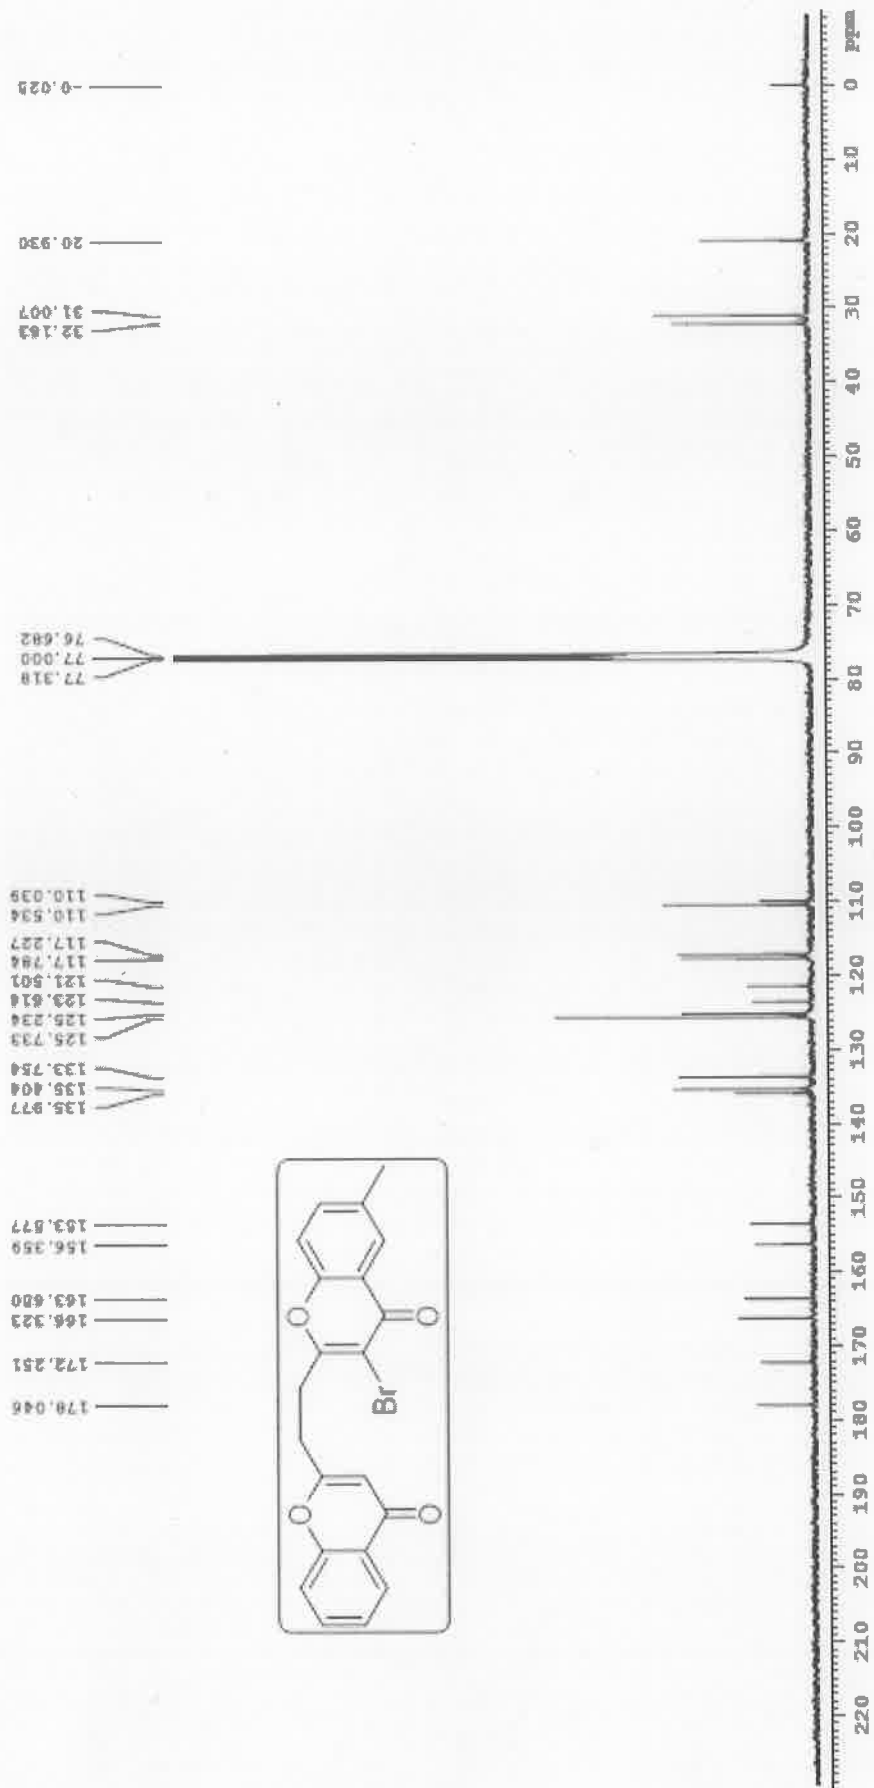

HRMS of 3-Bromo-6-methyl-2-(2-(4-oxo-4H-chromen-2-yl)ethyl)-4H-chromen-4-one (12)

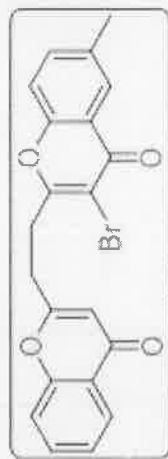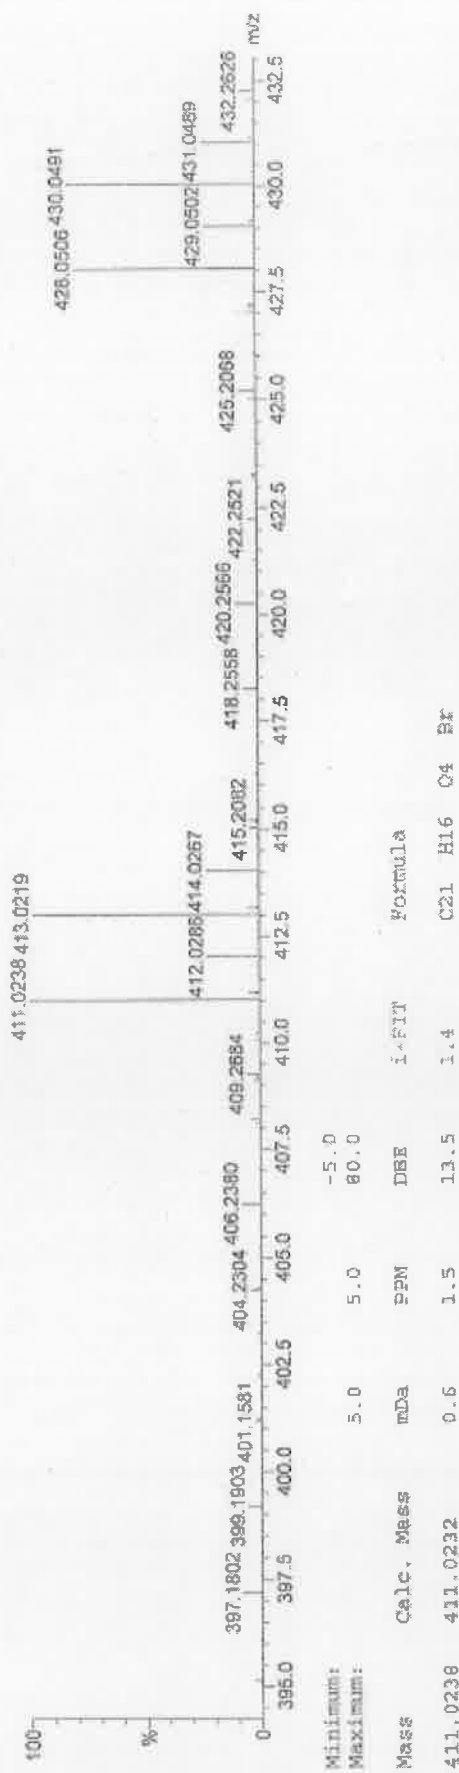

| Mass     | Calc. Mass | MSD | PPM | DBE  | i-FIT | Formula       |
|----------|------------|-----|-----|------|-------|---------------|
| 411.0238 | 411.0232   | 0.6 | 1.5 | 13.5 | 1.4   | C21 H16 O4 Br |
